# Supplementary material for: Cohort profile: the Westlake BioBank for Chinese (WBBC) pilot project
Source: PubMed Central journal article supplement — BMJ Open. 2021 Jun 28;11(6):e045564. doi: 10.1136/bmjopen-2020-045564 (PMC8240579; doi:10.1136/bmjopen-2020-045564), 2021-06-28
Supplement: bmjopen-2020-045564.draft_revisions.pdf [file bmjopen-2020-045564.draft_revisions.pdf]

# BMJ Open

BMJ Open is committed to open peer review. As part of this commitment we make the peer review history of every article we publish publicly available.

When an article is published we post the peer reviewers' comments and the authors' responses online. We also post the versions of the paper that were used during peer review. These are the versions that the peer review comments apply to.

The versions of the paper that follow are the versions that were submitted during the peer review process. They are not the versions of record or the final published versions. They should not be cited or distributed as the published version of this manuscript.

BMJ Open is an open access journal and the full, final, typeset and author-corrected version of record of the manuscript is available on our site with no access controls, subscription charges or pay-per-view fees (<http://bmjopen.bmj.com>).

If you have any questions on BMJ Open's open peer review process please email [info.bmjopen@bmj.com](mailto:info.bmjopen@bmj.com)

# BMJ Open

## The Westlake BioBank for Chinese (WBBC) pilot cohort: a prospective study for the late adolescence

|                               |                                                                                                                                                                                                                                                                                                                                                                                                                                                                                                                                                                                                                                                                                                                                                                                                                                                                                                                                                                                                                                                                                                                                               |
|-------------------------------|-----------------------------------------------------------------------------------------------------------------------------------------------------------------------------------------------------------------------------------------------------------------------------------------------------------------------------------------------------------------------------------------------------------------------------------------------------------------------------------------------------------------------------------------------------------------------------------------------------------------------------------------------------------------------------------------------------------------------------------------------------------------------------------------------------------------------------------------------------------------------------------------------------------------------------------------------------------------------------------------------------------------------------------------------------------------------------------------------------------------------------------------------|
| Journal:                      | <i>BMJ Open</i>                                                                                                                                                                                                                                                                                                                                                                                                                                                                                                                                                                                                                                                                                                                                                                                                                                                                                                                                                                                                                                                                                                                               |
| Manuscript ID                 | bmjopen-2020-045564                                                                                                                                                                                                                                                                                                                                                                                                                                                                                                                                                                                                                                                                                                                                                                                                                                                                                                                                                                                                                                                                                                                           |
| Article Type:                 | Cohort profile                                                                                                                                                                                                                                                                                                                                                                                                                                                                                                                                                                                                                                                                                                                                                                                                                                                                                                                                                                                                                                                                                                                                |
| Date Submitted by the Author: | 05-Oct-2020                                                                                                                                                                                                                                                                                                                                                                                                                                                                                                                                                                                                                                                                                                                                                                                                                                                                                                                                                                                                                                                                                                                                   |
| Complete List of Authors:     | Zhu, Xiao-Wei; Westlake University, Diseases & Population (DaP) Geninfo Lab; Fudan University, School of Life Sciences<br>Liu, Ke-Qi ; Jiangxi Medical College<br>Wang, Ping-Yu<br>Liu, Jun-Quan<br>Chen, Jin-Yang<br>Xu, Xue-Jin; Jiading District Center for Disease Control and Prevention<br>Xu, Jin-Jian; Jiangxi Medical College<br>Qiu, Mo-Chang; Jiangxi Medical College<br>Sun, Yi<br>Liu, Chu<br>Bai, Wei-Yang; Westlake University, Diseases & Population (DaP) Geninfo Lab; Fudan University, School of Life Sciences<br>Zhao, Pian-Pian; Westlake University School of Life Sciences, Diseases & Population (DaP) Geninfo Lab<br>Xia, Jiangwei; Westlake University, Diseases & Population (DaP) Geninfo Lab<br>Gai, Si-Rui ; Westlake University, Diseases & Population (DaP) Geninfo Lab<br>Guan, Peng-Lin; Westlake University, Diseases & Population (DaP) Geninfo Lab<br>Qian, Yu; Westlake University, Diseases & Population (DaP) Geninfo Lab<br>Cong, Pei-Kuan Cong; Westlake University, Diseases & Population (DaP) Geninfo Lab<br>Xie, Shu-Yang ; Binzhou Medical University<br>Zheng, Hou-Feng; Westlake University, |
| Keywords:                     | EPIDEMIOLOGY, OBSTETRICS, NUTRITION & DIETETICS, PAEDIATRICS                                                                                                                                                                                                                                                                                                                                                                                                                                                                                                                                                                                                                                                                                                                                                                                                                                                                                                                                                                                                                                                                                  |
|                               |                                                                                                                                                                                                                                                                                                                                                                                                                                                                                                                                                                                                                                                                                                                                                                                                                                                                                                                                                                                                                                                                                                                                               |

SCHOLARONE™  
Manuscripts

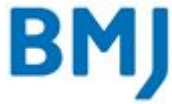

I, the Submitting Author has the right to grant and does grant on behalf of all authors of the Work (as defined in the below author licence), an exclusive licence and/or a non-exclusive licence for contributions from authors who are: i) UK Crown employees; ii) where BMJ has agreed a CC-BY licence shall apply, and/or iii) in accordance with the terms applicable for US Federal Government officers or employees acting as part of their official duties; on a worldwide, perpetual, irrevocable, royalty-free basis to BMJ Publishing Group Ltd ("BMJ") its licensees and where the relevant Journal is co-owned by BMJ to the co-owners of the Journal, to publish the Work in this journal and any other BMJ products and to exploit all rights, as set out in our [licence](#).

The Submitting Author accepts and understands that any supply made under these terms is made by BMJ to the Submitting Author unless you are acting as an employee on behalf of your employer or a postgraduate student of an affiliated institution which is paying any applicable article publishing charge ("APC") for Open Access articles. Where the Submitting Author wishes to make the Work available on an Open Access basis (and intends to pay the relevant APC), the terms of reuse of such Open Access shall be governed by a Creative Commons licence – details of these licences and which [Creative Commons](#) licence will apply to this Work are set out in our licence referred to above.

Other than as permitted in any relevant BMJ Author's Self Archiving Policies, I confirm this Work has not been accepted for publication elsewhere, is not being considered for publication elsewhere and does not duplicate material already published. I confirm all authors consent to publication of this Work and authorise the granting of this licence.

1  
2  
3  
4 The Westlake BioBank for Chinese (WBBC) pilot cohort: a prospective  
5  
6 study for the late adolescence  
7  
8  
9  
10

11 Xiao-Wei Zhu<sup>1,2,3</sup>, Ke-Qi Liu<sup>4</sup>, Ping-Yu Wang<sup>5</sup>, Jun-Quan Liu<sup>6,7</sup>, Jin-Yang Chen<sup>7</sup>,  
12  
13 Xue-Jin Xu<sup>8</sup>, Jin-Jian Xu<sup>4</sup>, Mo-Chang Qiu<sup>4</sup>, Yi Sun<sup>6</sup>, Chun Liu<sup>9</sup>, Wei-Yang Bai<sup>1,2,3</sup>,  
14  
15 Pian-Pian Zhao<sup>1,2</sup>, Jiangwei Xia<sup>1,2</sup>, Si-Rui Gai<sup>1,2</sup>, Peng-Lin Guan<sup>1,2</sup>, Yu Qian<sup>1,2</sup>, Pei-  
16  
17 Kuan Cong<sup>1,2</sup>, Shu-Yang Xie<sup>5</sup>, Hou-Feng Zheng<sup>1,2,3\*</sup>  
18  
19  
20

21 <sup>1</sup> Disease & Population (DaP) Geninfo Lab, School of Life Sciences, Westlake  
22  
23 University, Hangzhou, Zhejiang, 310024, China  
24

25 <sup>2</sup> Institute of Basic Medical Sciences, Westlake Institute for Advanced Study,  
26  
27 Westlake University, Hangzhou, Zhejiang, 310024, China  
28

29 <sup>3</sup> School of Life Sciences, Fudan University, Shanghai 200433, China  
30

31 <sup>4</sup> Jiangxi Medical College, Shangrao, Jiangxi, China  
32

33 <sup>5</sup> Department of Epidemiology & Department of Biochemistry and Molecular  
34  
35 Biology, Binzhou Medical University, Yantai, Shandong 264003, China  
36

37 <sup>6</sup> Hangzhou Kingmed Diagnostics Co., Ltd., Hangzhou, Zhejiang, 310053, China  
38

39 <sup>7</sup> Research and Development Department, Zhejiang Healthfuture Institute for Cell-  
40  
41 Based Applied Technology, Hangzhou, Zhejiang, China  
42

43 <sup>8</sup> Center for Disease Control and Prevention of Jiading District, Shanghai, China  
44

45 <sup>9</sup> Department of Health Management, Hangzhou Normal University, Hangzhou,  
46  
47 Zhejiang, 311121, China  
48  
49

50 \*Corresponding author: Hou-Feng Zheng. E-mail: zhenghoufeng@westlake.edu.cn  
51  
52  
53  
54  
55  
56  
57  
58  
59  
60

## 1 ABSTRACT

2 **Purpose:** The Westlake BioBank for Chinese (WBBC) pilot cohort is a population-  
3 based prospective study with its major purpose to better understand the effect of genetic  
4 and environmental factors on growth and development from adolescents to adults. The  
5 dataset comprises a wide range of demographics, anthropometric measures, physical  
6 activity, sleep quality, age at menarche and bone mineral density.

7 **Participants:** A total of 14,726 participants (4,751 males and 9975 females) aged 14–  
8 25 years were recruited and the baseline survey was carried out from 2017 to 2019. The  
9 pilot cohort contains rich range of information regarding of demographics,  
10 anthropometric measurements, lifestyle and sleep patterns, clinical and health outcomes.

11 **Findings to date:** The mean age of study sample were 18.55 years for boys and 18.48  
12 years for girls, respectively. The mean height and weight were 172.92 cm and 65.81 kg  
13 for boys, and 160.13 cm and 52.85 kg for girls. Results indicated that the prevalence of  
14 underweight in female was much higher than male, but the prevalence of overweight  
15 and obesity in female was lower than male. The mean of serum 25(OH)D level in the  
16 14,726 young participants was  $22.39 \pm 5.33$  ng/ml, and male had higher level of serum  
17 25(OH)D than female, overall, 33.47% of the participants had vitamin D deficiency and  
18 even more participants suffered from vitamin D insufficiency (58.17%). The proportion  
19 of deficiency in women was much higher than that in men (41.83 vs. 16.35%). The  
20 issue of underweight and vitamin D deficiency in young people should be paid attention,  
21 especially in females. These results reflected the fact that thinness and paler skin are  
22 preferred in modern aesthetics of Chinese culture.

23 **Future plans:** WBBC is designed as a prospective cohort study and provides a  
24 unique and rich data set analyzing health trajectories from adolescents to young  
25 adults.

26  
27 Key words: Cohort, Late adolescence, Nutrition, Obesity.  
28  
29

## 30 **Strengths and limitations**

31 The WBBC pilot study was designed to develop a longitudinal database on health-  
32 related factors for young people.

33 Firstly, this was a comprehensive cohort study to pay attention to the health of  
34 adolescence and young adults, including over ~14,000 participants.

35 Secondly, the WBBC pilot cohort is rich in longitudinal phenotypic data and archived  
36 biospecimens, including whole blood and serum as well as DNA samples. These  
37 resources will facilitate to digitize the information of the genomic, proteomic and  
38 metabolomic and microbiome of the participants, and further investigate the association  
39 of the information with the development of adolescence and young adults.

40 Thirdly, this cohort has now accrued sufficient events for reliable analyses, and the  
41 major findings on adiposity, BMD, sleep quality, nutrition and growth for adolescence  
42 are expected over the next few years.

43  
44 There are several limitations to this cohort design.

45 First, although the participants covered all around the country, most of them were  
46 mainly from 3 provinces (Jiangxi, Shandong and Zhejiang), and the selection of  
47 participants was not random, but in a specific population (college students).

48 Second, the participants were collected in 3 phases at different time points, and the  
49 phenotypic information was updated in the later phases, for example, the items in the  
50 questionnaire of different phases were not always the same, therefore, the phenotypic  
51 data were not always uniform in 3 phases.

52

## 53 Introduction

54 The initial goal of setting up this cohort is trying to bring up more attentions to the  
55 skeletal health in adolescence and adults, and thus to provide strategy in prevention of  
56 osteoporosis in the elderly. Osteoporosis, a disease of increased bone fragility, is a  
57 systemic osteopathy characterized by a decrease in bone density/quality and the  
58 destruction of bone microstructure caused by genetic and environmental factors<sup>1</sup>. Bone  
59 mineral density (BMD), the bone mineral content (BMC) in bone tissue, is recognized  
60 as the most important predictor of osteoporosis. Currently, approximately 200 million  
61 people worldwide suffer from osteoporosis, and 83.9 million of which are in China <sup>2</sup>.  
62 As the trend of global aging is becoming more and more obvious, more attention should  
63 be paid to the bone health not only in the elderly, but also in adolescence and young  
64 adults. Population-based studies have shown that roughly half of the boys and one-third  
65 of the girls would undergo a fracture by age of 18 and 1/5 would have two or more  
66 fractures<sup>3 4</sup>. Epidemiologic studies have shown that a 10% increase in peak bone mass  
67 (PBM) at the population level reduces the risk of fracture later in life by 50%<sup>5</sup>. In fact,  
68 bone mass attained in early life was considered to be the most important modifiable  
69 determinant of lifelong skeletal health. A longitudinal data have shown that more than  
70 94% of BMD was acquired at the age of sixteen<sup>6</sup> and approximately 40% to 60% of  
71 adult bone mass was accrued during the adolescent years in both women and men<sup>7</sup>.

72  
73 Any condition interfering with optimal peak bone mass accrual can, therefore, increase  
74 fracture risk later in life, adolescence is critical period for skeletal mineralization. The  
75 bone mass gain during adolescence is influenced by multiple factors, including genetic  
76 factors, ethnicity, and environmental factors, such as alcohol intake, cigarette smoking,  
77 physical activity, endocrine status (e.g. vitamin D), diet (calcium and protein intake)  
78 and other factors<sup>5 8-15</sup>. As environmental and behavioral factors account for 20% to 40%  
79 of adult peak bone mass<sup>16 17</sup>, the early identification of the factors associated with poor  
80 bone health and the provision of reliable counseling might help children and teenagers  
81 take action to maximize BMD before their PBM was completed.

82  
83 Overweight and obesity are a major public health problem<sup>18</sup>. Elevated body mass index  
84 (BMI) in adolescence had been associated with several obesity-related morbidities in  
85 adult life, such as diabetes, metabolic syndromes and some types of cancer<sup>19</sup>. And  
86 obesity in adolescence conferred very high risks for obesity in adults<sup>20</sup>; 70% of  
87 overweight adolescents had one or more concomitant conditions such as high blood  
88 pressures and fasting insulin, which were also risk factors for cardiovascular disease,  
89 and 23% of those accompanied with three or more concomitant conditions<sup>21</sup>. Following  
90 rapid economic development since the 1980s, China experiences a rapidly increasing  
91 of overweight and obesity among children and adolescents<sup>22 23</sup>. In 2019, a cross-  
92 sectional study<sup>24</sup> found that the prevalence of overweight in college students (aged 18-  
93 26 years) was 8.0%, and the prevalence of obesity was 3.5%. A recent study from 12  
94 provinces in China showed that the prevalence of overweight and obesity were 14.0%  
95 and 10.5% in boys, and 9.7% and 7.1% in girls, respectively<sup>25</sup>.

96  
97 Vitamin D deficiency is becoming a public health problem in both developed and  
98 developing countries<sup>26 27</sup>. Besides its effect on musculoskeletal system, Vitamin D  
99 showed pleiotropic effect on human health, such as cardiovascular diseases<sup>28</sup>, common  
100 infectious diseases<sup>29</sup> and autoimmune diseases<sup>30</sup>. Serum 25(OH)D is a good indicator  
101 of vitamin D storage and is an optimal method of assessing vitamin D levels<sup>26</sup>.  
102 According to the Endocrine Society clinical practice guidelines, vitamin D levels were  
103 defined as deficiency [25(OH)D<20 ng/mL], insufficiency [25(OH)D: 20-29 ng/mL]  
104 and sufficiency [25(OH)D≥30 ng/mL] respectively<sup>31</sup>. Many people in central and  
105 western Europe had vitamin D concentration of 11–20 ng/mL in winter<sup>32</sup>. Studies from  
106 other countries, including Canada<sup>33</sup>, Japan<sup>34</sup>, Australia<sup>35</sup> and Iran<sup>36</sup>, presented similar  
107 situations, with high prevalence of vitamin D insufficiency in different ethnicities. A  
108 study in north China found that more than 40% of adolescent girls had Vitamin D-  
109 deficiency in the winter<sup>37</sup>. Another study in Shanghai showed that more than one-third  
110 newborns had plasma 25(OH)D less than 20 ng/mL<sup>38</sup>. Even in Hong Kong (latitude 22°  
111 north), 72% of young adults were reported to have vitamin D deficiency<sup>39</sup>.



112

113 The overall goal of the Westlake Biobank for Chinese (WBBC) pilot cohort is to recruit  
114 individuals at their late adolescence/young adulthood. The biological samples such as  
115 whole blood, serum, urine and faeces were collected, genomic DNA were extracted and  
116 the DNA sequence information were acquired through sequencing technique. A long  
117 questionnaire with questions concerning the environmental factors such as nutrition,  
118 sleep quality, physical activity, medication etc was provided. These data will help us to  
119 understand the association between the genetics, environmental factors, microbiome  
120 and health statue of adolescence population. With a broad range of phenotype collection  
121 on many aspects of participants' daily life, a wide range of scientific questions could  
122 be addressed. The main purpose of this particular paper is to profile the cohort, therefore,  
123 only limited findings were described, such as: (1) what are the prevalence of  
124 underweight, overweight, obesity and vitamin D deficiency in Chinese late adolescence?  
125 What is the reference value of serum vitamin D level in the young people? (2) what is  
126 the difference between male and female in term of height, weight, blood pressure,  
127 lifestyle and bone health in the young people.

128

## 129 **Cohort description**

### 130 **Sampling Design**

131 The Westlake Biobank for Chinese (WBBC) pilot study was collected in three main  
132 regions in China (Zhejiang province, Jiangxi province and Shandong province), but the  
133 participants covered all around the country (Table 1 and Figure 1). The baseline survey  
134 was carried out from 2017 to 2019. The target population was young people aged 14–  
135 25 years who were college students and available for follow-up studies. In the first  
136 phase of baseline (WBBC pilot 1), the participants were recruited from two colleges at  
137 Zhejiang province and Jiangxi province in Southeast China from September 2017 to  
138 March 2018 (Figure 2), and 1,258 and 2,769 participants were from Zhejiang and  
139 Jiangxi provinces, respectively, and 1,263 participants were from other 25 provinces of  
140 China (Table 1). From September 2018 to December 2018, the second phase of WBBC

1  
2  
3  
4 141 pilot project was initiated (WBBC pilot 2), the participants were recruited at the same  
5  
6 142 college in Jiangxi province and a college in Shandong province in Northeast China  
7  
8 143 (Figure 2). There were 2,920 participants from Shandong province, 2,032 participants  
9  
10 144 from Jiangxi province and 1,306 participants from other 28 provinces of China in  
11  
12 145 WBBC pilot 2 (Table 1). From September 2019, the WBBC pilot project phase 3  
13  
14 146 (WBBC pilot 3) recruited participants from the same college in Jiangxi province  
15  
16 147 (Figure 2), most of the participants (2,504) of WBBC pilot 3 were from Jiangxi  
17  
18 148 province and 6,74 participants were from other 26 provinces of China (Table 1). All  
19  
20 149 participants provided their Chinese unique national identity (ID) number for unique  
21  
22 150 reference at the health examination center in the campus. The inclusive criteria were:  
23  
24 151 a). All study participants signed the informed consent form before taking part in the  
25  
26 152 survey. b). Participants should complete the physical examination, bone mineral density  
27  
28 153 scan, blood test and questionnaires. And the exclusion criteria were: a). No informed  
29  
30 154 consent. b). Participants missed most of the items in data collection. In WBBC pilot 3,  
31  
32 155 the urine and feces of the participants were collected, therefore, participants taking  
33  
34 156 antibiotics should be excluded.

35 157

### 36 158 **Data Collection Procedures**

37  
38 159 The WBBC pilot study is a multidisciplinary study and contains rich range of  
39  
40 160 information regarding of demographics, anthropometric measurements, blood pressure  
41  
42 161 and heart rate, lifestyle and sleep patterns, biological, clinical and health outcomes.  
43  
44 162 Genomic data are available for 7,033 participants. Data and samples were collected via  
45  
46 163 examinations, questionnaire and venipuncture (Table 2).

47 164

#### 48 165 *Measurements of anthropometric parameters*

49  
50 166 Anthropometric data included height, body weight, bust, waist, hip and thigh  
51  
52 167 circumference, resting blood pressure, heart rate and hand grip. Height was measured  
53  
54 168 to the nearest 0.1 cm with participants' light-weight clothes and shoes off; weight was  
55  
56 169 measured to the nearest 0.01 kg with the weight scale (Ultrasonic surveying instrument,  
57  
58 170 Beryl BYH01, China) calibrated daily before each series of measurements. Bust, waist,

1  
2  
3  
4 171 hip and thigh circumference were measured to the nearest 0.5 cm by using a measuring  
5  
6 172 tape with the subject standing comfortably. Resting blood pressure and heart rate were  
7  
8 173 measured on the left arm supported at heart-level sitting position using electronic  
9  
10 174 sphygmomanometers (Yuwell YE660A, China). To ensure accurate data, the  
11  
12 175 participants were asked to have rested for at least 5 minutes and have no excessive  
13  
14 176 physical activity, tea or alcohol intake or smoking for at least one night. Using a  
15  
16 177 handgrip dynamometer (CAMRY EH101, China), grip strength with both hands were  
17  
18 178 tested for most of the participants in WBBC pilot 2 and WBBC pilot 3. In order to get  
19  
20 179 more accurate results, the participants should make sure the arm that's being tested was  
21  
22 180 at a 90 degree angle at the elbow<sup>40</sup> until the test was finished. Details of the methods  
23  
24 181 and instruments used for measurements of anthropometric parameters were provided in  
25  
26 182 Table 3.

27 183

#### 28 184 *Biochemistry assessment*

29  
30  
31 185 Participants came to the examination center in each college in the morning with at least  
32  
33 186 8 h of overnight fasting, about 25 ml of venous blood samples were collected for routine  
34  
35 187 blood measurements, biochemical indexes, DNA extraction and so on. Venous blood  
36  
37 188 samples were collected using ethylenediamine tetraacetic acid dipotassium (EDTAK2)  
38  
39 189 anticoagulation tube (3×5.0 ml) and vacuum tube without anticoagulation (2×5.0 ml).  
40  
41 190 Serum and plasma samples were separated from whole blood through centrifugation  
42  
43 191 for 10 min at the relative centrifugal force 3000 g (Figure 3). Serum samples were  
44  
45 192 forwarded to test biochemical indexes that included serum 25(OH)D level, serum  
46  
47 193 calcium level, fasting blood glucose, kidney function test, hepatic function test, blood  
48  
49 194 lipids [triglyceride, cholesterol, low-density lipoprotein (LDL), high-density  
50  
51 195 lipoprotein (HDL)], triiodothyronine (T3), thyroid and parathyroid function and bone  
52  
53 196 turnover markers (Table 2). Details of the platforms used for biochemical analysis are  
54  
55 197 provided in Table 3. We also reserved serum samples (2×0.5ml) for each participant at  
56  
57 198 - 80°C for future use. Figure 3 displays the detail of the flow diagram of blood separation  
58  
59 199 and detection of main blood biochemical indexes.

60 200

1  
2  
3  
4 201 *Questionnaire-based assessments*

5 202 Baseline data collection for participants included a self-completion questionnaire. In  
6  
7 203 Table 2, a list of core questions within the aforementioned domains, was provided. The  
8  
9 204 questionnaire included social and demographic measures data (e.g. age, sex, ethnicity,  
10  
11 205 family economic status and born place), menstrual history (for female), lifestyle (e.g.  
12  
13 206 physical activity, smoking status, alcohol, tea and coffee intake), additional supplement  
14  
15 207 (e.g. calcium and vitamin D), health status and other information. Sleep duration and  
16  
17 208 sleep quality were assessed by the Pittsburgh Sleep Quality Index (PSQI)<sup>41</sup>. This is  
18  
19 209 composed of 19 questions which reflect seven major components, all seven components  
20  
21 210 are then summed up to create a scale from 0–21 points.  
22

23  
24  
25 212 *Bone mineral density assessment*

26  
27 213 Bone mineral density (BMD) is expressed in terms of bone mass per cm<sup>2</sup> (g/cm<sup>2</sup>) and  
28  
29 214 were assessed by dual-energy X-ray absorptiometry<sup>42</sup> (DXA, Discovery QDR 4500;  
30  
31 215 Hologic Inc., Waltham, MA, USA). In WBBC pilot, the main sites for BMD evaluation  
32  
33 216 were lumbar spine (L1–L4), femur (femoral neck and total hip) and distal third of the  
34  
35 217 radius.  
36

37 218  
38  
39 219 *Whole Genome sequencing and genotyping*

40  
41 220 In the process of collecting fasting venous blood, 5-ml whole blood was used for  
42  
43 221 isolation of genomic DNA. These genomic DNA were used for whole genome  
44  
45 222 sequencing and genotyping (Figure 3). Whole genome sequencing was completed by  
46  
47 223 NovaSeq 6000 system (Illumina Co., Ltd), and for now, 1,192 participants have been  
48  
49 224 sequenced at mean depth of 14x, with highest depth of 65x. A Chinese specific  
50  
51 225 reference panel will be constructed for imputation for Chinese population. Whole  
52  
53 226 genome genotyping was completed with Infinium Asian Screening Array (ASA)  
54  
55 227 (Illumina Co., Ltd), and 5,841 participants have been genotyped in approximately  
56  
57 228 700,000 SNPs.  
58

59 229  
60 230 *Follow-up and outcome measures*

1  
2  
3  
4 231 We are seeking funding to follow the cohort to examine development and growth of the  
5  
6 232 participants, and to investigate the effect of environmental factors on later outcomes.  
7  
8 233 An important area of future research will focus on the development of bone mineral  
9  
10 234 density and body weight from late adolescence to adulthood. Figure 2 shows the overall  
11  
12 235 study plan. Follow-up surveys will be conducted according to the design of the  
13  
14 236 subsequent research projects, the participants will be invited for re-survey with repeat  
15  
16 237 interviews, including the questionnaire, anthropometric measurements, grip strength  
17  
18 238 and bone mineral density collection as those used in the baseline stage and the data of  
19  
20 239 nutritional status by food frequency questionnaire.  
21

22  
23 241 We have started a pilot follow-up study for WBBC pilot 2 since December 2019, and  
24  
25 242 1,303 participants had completed all examinations (Figure 2). The collected  
26  
27 243 information included height, weight, grip strength and the updated questionnaire.  
28  
29 244 Besides, we retested bone mineral density at spine (L1-L4), hip and distal third of the  
30  
31 245 radius.  
32

### 33 246 34 35 247 **Statistical analysis**

36  
37 248 To test differences in means and proportions between male and female, we used T-test  
38  
39 249 and Chi-square tests for continuous and categorical variables, respectively. All  
40  
41 250 variables were presented by unadjusted proportions for categorical variables and  
42  
43 251 unadjusted means with standard deviations (SD) for continuous variables. The variables  
44  
45 252 demonstrating a p-value of less than 0.05 were considered statistically significant. All  
46  
47 253 statistical analyses were analyzed using Stata 12.0 software.  
48

### 49 254 50 51 255 **Findings to date**

52  
53 256 This pilot cohort of WBBC is a large longitudinal survey conducted among adolescents  
54  
55 257 and young adults in China. We surveyed 14,726 young people aged 14–25 years who  
56  
57 258 were college students and available for completing follow-up studies. The baseline  
58  
59 259 survey was carried out from 2017 to 2019, including WBBC pilot 1 (5,290 participants),  
60

1  
2  
3  
4 260 WBBC pilot 2 (6,258 participants) and WBBC pilot 3 (3,178 participants).

5  
6 261

7 262 We have several ongoing projects under WBBC pilot study. One of the most significant  
8  
9 263 ongoing projects is the study of Chinese population structure. In WBBC pilot study, the  
10  
11 264 data from 1,192 samples with whole genome sequencing and 5,841 samples with whole  
12  
13 265 genome genotyping were available, collaborating with another research group in China,  
14  
15 266 we finally achieved approximate ~10,000 Chinese samples with whole genome data,  
16  
17 267 covering 30 provincial region of China. In addition, WBBC pilot study will provide a  
18  
19 268 haplotype reference panel to improve the imputation accuracy of Chinese GWAS study,  
20  
21 269 since our previous study<sup>43</sup> demonstrated that the existing reference panels, such as the  
22  
23 270 1000 Genome Phase3 panel<sup>44</sup> and the HRC (Haplotype Reference Consortium) panel<sup>45</sup>,  
24  
25 271 were not best fit for imputation for Chinese population, especially for the rare variant  
26  
27 272 imputation.

28  
29 273

30  
31 274 Given the extensive range of data collection in the WBBC study, it is not feasible to  
32  
33 275 present all the results, only limited findings were described in the present study. In  
34  
35 276 summary, a total of 17,407 college students were invited, of whom, 14,983 (86.07 %)   
36  
37 277 responded. After removing participants with missing data and invalid data, the final  
38  
39 278 study included an effective sample size of 14,726 (84.60%) adolescents and young  
40  
41 279 adults (with age from 14 to 25 years, and mean age at 18.5 years). Table 4 provides an  
42  
43 280 overview of socio-demographic, anthropometry, cardiovascular system, lifestyle, grip  
44  
45 281 strength and BMD characteristics of the WBBC pilot participants at baseline. Briefly,  
46  
47 282 within the 14,726 sample, there were more females than males (67.74 vs. 32.26%), with  
48  
49 283 mean age of 18.48 years for women and 18.55 years for men, respectively. Most of the  
50  
51 284 participants were Chinese Han ethnic (97.78), and more than 60% of them were  
52  
53 285 originally from rural areas (60.24% of males and 69.62% of females). For  
54  
55 286 anthropometry measurements, the mean height and weight were 172.92 cm and 65.81  
56  
57 287 kg for men, and 160.13 cm and 52.85 kg for women; the mean waist, hip and thigh  
58  
59 288 circumference were 75.51cm, 90.75cm and 51.56 cm in men, and 71.67cm, 89.75cm  
60  
289 and 51.68 among women. The mean systolic blood pressure (SBP), diastolic blood



1  
2  
3  
4 290 pressure (DBP) and heart rate (HR) in participants were 113 mmHg, 71 mmHg and 86  
5 291 beats/minute, respectively. In the cohort, only 5.49% of the participants were current  
6 292 smokers and 38.82% of them were regular drinkers. Regarding the current smoking  
7 293 status, there was significant difference between men and women (16.29 vs. 1.64%,  $p <$   
8 294 0.001). As for alcohol consumption, the proportion of current drinker in boys and girls  
9 295 were 62.03% and 29.19%, respectively, which is much higher in males ( $p <$  0.001). The  
10 296 mean sleeping time estimated in women were higher than men (8.34 vs. 7.97 hours,  $p$   
11 297  $<$  0.001). As for grip strength, the data collection was started from WBBC pilot 2, the  
12 298 mean of grip strength in boys were much higher than girls (grip-left: 36.66 vs. 27.38kg  
13 299 and grip-right: 39.90 vs. 29.76 kg, both  $p <$  0.001).

20  
21  
22  
23 300

24 301 Height and weight were measured using the standardized procedures. Body mass index  
25 302 (BMI) was calculated based on the formula: weight in kilograms divided by height in  
26 303 meters-squared ( $\text{kg}/\text{m}^2$ ). According to the Working Group on Obesity in China  
27 304 (WGOC)<sup>46</sup>, participants were defined as underweight ( $<$  18.5  $\text{kg}/\text{m}^2$ ), normal weight  
28 305 (18.5-23.9  $\text{kg}/\text{m}^2$ ), overweight (24-27.9  $\text{kg}/\text{m}^2$ ) and obese ( $\geq$  28  $\text{kg}/\text{m}^2$ ). Therefore, the  
29 306 WBBC pilot study provided an overall prevalence of underweight, overweight and  
30 307 obesity among young participants of 24.26%, 11.50% and 5.03%, respectively (Table  
31 308 5). The prevalence of underweight in female was much higher than male (26.41% vs.  
32 309 19.70%,  $p <$  0.0001), but the prevalence of overweight in female was much lower than  
33 310 male (9.03% vs. 16.71%,  $p <$  0.0001) (Table 5), similarly, the prevalence of obesity in  
34 311 female (3.21%) was lower than in male (8.88%) ( $p <$  0.0001) (Table 5). Waist  
35 312 circumference (WC) is good indicator of abdominal visceral fat distribution and is a  
36 313 strong predictor of diabetes mellitus and cardiovascular disease<sup>47</sup>. It is meaningful to  
37 314 investigate the WC along with BMI among adolescents and young people. In WBBC  
38 315 pilot study, central obesity was defined as  $\text{WC} \geq 85$  cm for men and as  $\text{WC} \geq 80$  cm for  
39 316 women based on the recommendations of the WGOC<sup>46</sup>. In the cohort of 12,396  
40 317 participants, the prevalence of central obesity was 14.62%, which was higher in male  
41 318 than in female (19.10% vs. 12.55%,  $p <$  0.0001) (Table 5).

42  
43  
44  
45  
46  
47  
48  
49  
50  
51  
52  
53  
54  
55  
56  
57  
58  
59  
60 319

1  
2  
3  
4 320 In WBBC pilot study, the prevalence of underweight were high in both male (19.70 %)  
5  
6 321 and female (26.41%), though the prevalence of moderate and severe underweight  
7  
8 322 decreased from 9.2% in 1975 to 8.4% in 2016 in girls and from 14.8% in 1975 to 12.4%  
9  
10 323 in 2016 in boys in the world<sup>48</sup>. This phenomenon may due to the modern aesthetics of  
11  
12 324 human stature that thinness is preferred, especially in China<sup>49</sup> <sup>50</sup>. Recently, a study  
13  
14 325 involving 2,023 young female participants (70.5% subjects aged 20-25 years) from  
15  
16 326 eight Chinese universities<sup>50</sup> showed that 30.55% of the participants were underweight,  
17  
18 327 and 57.39% of them would like to be much thinner, which would lead to more  
19  
20 328 underweight individuals. Therefore, future studies should not only pay attention to the  
21  
22 329 problem of obesity/overweight, but also to the underweight issue in young people.

23  
24 330

25 331 Using simple anthropometric indices of body composition, such as BMI and WC, has  
26  
27 332 been considered as a practical and valuable approach to the assessment of obesity for a  
28  
29 333 long time. Waist-to-hip ratios (WHR), waist-to-height ratios (WHtR), a body shape  
30  
31 334 index (ABSI)<sup>51</sup> and body roundness index (BRI)<sup>52</sup> were also as parameters of body fat  
32  
33 335 and visceral adipose tissue volume. In WBBC pilot cohort, we had collected several  
34  
35 336 anthropometric measures including height, weight, bust, waist, hip and thigh  
36  
37 337 circumference and these data could help us examine the usefulness of these  
38  
39 338 anthropometric parameters and identify the optimal cut-off of the parameters to  
40  
41 339 evaluate overweight and obesity among adolescence and young people in future study.

42  
43 340

44 341 In WBBC pilot study, the mean serum 25(OH)D level was  $22.39 \pm 5.33$  ng/ml for all  
45  
46 342 the participants (male: 25.15 ng/mL, and female: 21.05 ng/mL,  $p < 0.0001$ ) (Table 6).  
47  
48 343 Overall, 33.47% of the participants had vitamin D deficiency and even more  
49  
50 344 participants suffered from vitamin D insufficiency (58.17%) (Table 6). In addition, the  
51  
52 345 proportion of women with sufficient vitamin D was much lower than that of men (3.69  
53  
54 346 vs. 17.91%,  $p < 0.0001$ ), while the proportion of deficiency in women was much higher  
55  
56 347 than that in men (41.83 vs. 16.35%,  $p < 0.0001$ ) (Table 6). Most of the participants  
57  
58 348 (86.87%) preferred to stay indoors in spare time, the females were less willing to do  
59  
60 349 exercise than males (53.68% vs 70.59%) (Table 7), and 44.58% of females hardly had



1  
2  
3  
4 350 outdoor activities, only 5.89% of females often had outdoor activities every week  
5  
6 351 (Table 7). These results jointly suggested that the females had not enough sun exposure.  
7  
8 352 Although food sources of vitamin D were not commonly recognized, only 10–20% of  
9  
10 353 vitamin D in human bodies was obtained through food sources<sup>53</sup>. In WBBC pilot study,  
11  
12 354 there was only 2.24% of the participants used vitamin D supplements (3.12% in male  
13  
14 355 and 1.87% in female,  $p = 0.00098$ ) (Table 6) and this was consistent with Zhou et al<sup>54</sup>,  
15  
16 356 which found that only 5.6 % of the students used vitamin D supplements in a university  
17  
18 357 of Nanjing, China. It is noteworthy that vitamin D deficiency in females was  
19  
20 358 significantly worse than in males. This may due to the modern aesthetics of Chinese  
21  
22 359 culture that paler skin is preferred, especially in females. A questionnaire related to  
23  
24 360 vitamin D and sun exposure was conducted at a university in Nanjing, China and found  
25  
26 361 that 75.0 % of the students lacked sun exposure because they would like to avoid dark  
27  
28 362 skin, and most of students (82.7 %) used sun protection, and sunscreen use were more  
29  
30 363 popular in females<sup>54</sup>, but it was reported that using the amount of sun cream  
31  
32 364 recommended by World Health Organization exponentially suppressed vitamin D  
33  
34 365 synthesis in the skin<sup>55</sup>.

35 366

## 367 **Collaboration**

368 Participants have agreed to provide their pseudonymized data being made available to  
369 other approved researchers. The WBBC pilot study welcomes and offers global  
370 collaboration. The data is not freely available in the public domain, but specific  
371 proposals and ideas for future collaboration would be very welcome. Applicants for  
372 collaboration and more information are encouraged to contact Dr. Hou-Feng Zheng  
373 (Email address: zhenghoufeng@westlake.edu.cn), the person in charge of this project.

374

## 375 **Funding**

376 This study was supported by the National Natural Science Foundation of China  
377 (81871831), and by the Zhejiang Provincial Natural Science Foundation for  
378 Distinguished Young Scholars of China (LR17H070001), and by the Westlake Biobank

1  
2  
3  
4 379 for Chinese (WBBC) funds from Westlake University.  
5  
6 380

## 7 8 381 **Acknowledgements**

9  
10 382 We gratefully acknowledge all the participants of this project, and thank all the people  
11 383 who helped us in the sample recruitment, including volunteers, laboratory technicians,  
12 384 nurses and clerical workers. We also thank the Westlake University Supercomputer  
13 385 Center for the facility support and technical assistance. In addition, we would like to  
14 386 thank Shanghai AvantaBio BioSciences Co., Ltd for their support and assistance in  
15 387 sample storage and management.  
16  
17  
18  
19  
20  
21  
22 388

## 23 24 25 389 **Contributors**

26  
27 390 Hou-Feng Zheng gained funding and conceived of the study, and all authors were  
28 391 involved in the design and collection data of the study. Xiao-Wei Zhu and Hou-Feng  
29 392 Zheng analyzed the data and wrote the paper and all authors commented on previous  
30 393 versions of the manuscript. All authors read and approved the final manuscript.  
31  
32  
33  
34  
35 394

## 36 37 38 395 **Conflict of interest**

39  
40 396 Jun-Quan Liu and Yi Sun are employees of Hangzhou Kingmed Diagnostics Co., Ltd.  
41 397 The other authors have no conflict of interest to declare.  
42  
43  
44 398

## 45 46 399 **Patient and public involvement**

47  
48 400 It was not appropriate or possible to involve patients or the public in the design, or  
49 401 conduct, or reporting, or dissemination plans of our research.  
50  
51  
52 402

## 53 54 403 **Ethics Approval and Consent to Participate**

55  
56 404 The study protocol and informed consent procedure were approved by the Ethics  
57 405 Committees at Westlake University. All study participants signed the informed consent  
58  
59  
60

1  
2  
3  
4  
5  
6  
7  
8  
9  
10  
11  
12  
13  
14  
15  
16  
17  
18  
19  
20  
21  
22  
23  
24  
25  
26  
27  
28  
29  
30  
31  
32  
33  
34  
35  
36  
37  
38  
39  
40  
41  
42  
43  
44  
45  
46  
47  
48  
49  
50  
51  
52  
53  
54  
55  
56  
57  
58  
59  
60

406 form before taking part in the study.

For peer review only

## References

1. Armas LA, Recker RR. Pathophysiology of osteoporosis: new mechanistic insights. *Endocrinology and metabolism clinics of North America* 2012;41(3):475-86. doi: 10.1016/j.ecl.2012.04.006
2. Pisani P, Renna MD, Conversano F, et al. Major osteoporotic fragility fractures: Risk factor updates and societal impact. *World journal of orthopedics* 2016;7(3):171-81. doi: 10.5312/wjo.v7.i3.171
3. Mayranpaa MK, Makitie O, Kallio PE. Decreasing incidence and changing pattern of childhood fractures: A population-based study. *Journal of bone and mineral research : the official journal of the American Society for Bone and Mineral Research* 2010;25(12):2752-9. doi: 10.1002/jbmr.155
4. Bishop N, Arundel P, Clark E, et al. Fracture prediction and the definition of osteoporosis in children and adolescents: the ISCD 2013 Pediatric Official Positions. *Journal of clinical densitometry : the official journal of the International Society for Clinical Densitometry* 2014;17(2):275-80. doi: 10.1016/j.jocd.2014.01.004
5. Gordon CM, Zemel BS, Wren TA, et al. The Determinants of Peak Bone Mass. *The Journal of pediatrics* 2017;180:261-69. doi: 10.1016/j.jpeds.2016.09.056
6. Berger C, Goltzman D, Langsetmo L, et al. Peak bone mass from longitudinal data: implications for the prevalence, pathophysiology, and diagnosis of osteoporosis. *Journal of bone and mineral research : the official journal of the American Society for Bone and Mineral Research* 2010;25(9):1948-57. doi: 10.1002/jbmr.95
7. Golden NH, Abrams SA, Committee on N. Optimizing bone health in children and adolescents. *Pediatrics* 2014;134(4):e1229-43. doi: 10.1542/peds.2014-2173
8. Gaddini GW, Turner RT, Grant KA, et al. Alcohol: A Simple Nutrient with Complex Actions on Bone in the Adult Skeleton. *Alcoholism, clinical and experimental research* 2016;40(4):657-71. doi: 10.1111/acer.13000
9. Rudang R, Darelid A, Nilsson M, et al. Smoking is associated with impaired bone mass development in young adult men: a 5-year longitudinal study. *Journal of bone and mineral research : the official journal of the American Society for Bone and Mineral Research* 2012;27(10):2189-97. doi: 10.1002/jbmr.1674
10. Troy KL, Mancuso ME, Butler TA, et al. Exercise Early and Often: Effects of Physical Activity and Exercise on Women's Bone Health. *International journal of environmental research and public health* 2018;15(5) doi: 10.3390/ijerph15050878
11. Reid IR. Vitamin D Effect on Bone Mineral Density and Fractures. *Endocrinology and metabolism clinics of North America* 2017;46(4):935-45. doi: 10.1016/j.ecl.2017.07.005
12. Monge MC. Optimizing bone health in adolescents. *Current opinion in obstetrics & gynecology* 2018;30(5):310-15. doi: 10.1097/GCO.0000000000000482
13. Zhu X, Zheng H. Factors influencing peak bone mass gain. *Front Med* 2020 doi: 10.1007/s11684-020-0748-y
14. Xia J, Xie SY, Liu KQ, et al. Systemic evaluation of the relationship between psoriasis, psoriatic arthritis and osteoporosis: observational and Mendelian randomisation study. *Ann Rheum Dis* 2020 doi: 10.1136/annrheumdis-2020-217892
15. Bai WY, Wang L, Ying ZM, et al. Identification of PIEZO1 polymorphisms for human bone mineral density. *Bone* 2020;133:115247. doi: 10.1016/j.bone.2020.115247

16. Heaney RP, Abrams S, Dawson-Hughes B, et al. Peak bone mass. *Osteoporosis international : a journal established as result of cooperation between the European Foundation for Osteoporosis and the National Osteoporosis Foundation of the USA* 2000;11(12):985-1009. doi: 10.1007/s001980070020
17. Bachrach LK. Acquisition of optimal bone mass in childhood and adolescence. *Trends in endocrinology and metabolism: TEM* 2001;12(1):22-8. doi: 10.1016/s1043-2760(00)00336-2
18. Collaborators GBDO, Afshin A, Forouzanfar MH, et al. Health Effects of Overweight and Obesity in 195 Countries over 25 Years. *The New England journal of medicine* 2017;377(1):13-27. doi: 10.1056/NEJMoa1614362
19. Llewellyn A, Simmonds M, Owen CG, et al. Childhood obesity as a predictor of morbidity in adulthood: a systematic review and meta-analysis. *Obesity reviews : an official journal of the International Association for the Study of Obesity* 2016;17(1):56-67. doi: 10.1111/obr.12316
20. Patton GC, Coffey C, Carlin JB, et al. Overweight and obesity between adolescence and young adulthood: a 10-year prospective cohort study. *The Journal of adolescent health : official publication of the Society for Adolescent Medicine* 2011;48(3):275-80. doi: 10.1016/j.jadohealth.2010.06.019
21. Freedman DS, Kahn HS, Mei Z, et al. Relation of body mass index and waist-to-height ratio to cardiovascular disease risk factors in children and adolescents: the Bogalusa Heart Study. *The American journal of clinical nutrition* 2007;86(1):33-40. doi: 10.1093/ajcn/86.1.33
22. Yu Z, Han S, Chu J, et al. Trends in overweight and obesity among children and adolescents in China from 1981 to 2010: a meta-analysis. *PloS one* 2012;7(12):e51949. doi: 10.1371/journal.pone.0051949
23. Ng M, Fleming T, Robinson M, et al. Global, regional, and national prevalence of overweight and obesity in children and adults during 1980-2013: a systematic analysis for the Global Burden of Disease Study 2013. *Lancet* 2014;384(9945):766-81. doi: 10.1016/S0140-6736(14)60460-8
24. Jiang Y, Wang J, Wu S, et al. Association between Take-Out Food Consumption and Obesity among Chinese University Students: A Cross-Sectional Study. *International journal of environmental research and public health* 2019;16(6) doi: 10.3390/ijerph16061071
25. Zhang J, Wang H, Wang Z, et al. Prevalence and stabilizing trends in overweight and obesity among children and adolescents in China, 2011-2015. *BMC public health* 2018;18(1):571. doi: 10.1186/s12889-018-5483-9
26. Holick MF. Vitamin D deficiency. *The New England journal of medicine* 2007;357(3):266-81. doi: 10.1056/NEJMr070553
27. van Schoor N, Lips P. Global Overview of Vitamin D Status. *Endocrinology and metabolism clinics of North America* 2017;46(4):845-70. doi: 10.1016/j.ecl.2017.07.002
28. Trehan N, Afonso L, Levine DL, et al. Vitamin D Deficiency, Supplementation, and Cardiovascular Health. *Critical pathways in cardiology* 2017;16(3):109-18. doi: 10.1097/HPC.000000000000122
29. Watkins RR, Lemonovich TL, Salata RA. An update on the association of vitamin D deficiency with common infectious diseases. *Canadian journal of physiology and pharmacology* 2015;93(5):363-8. doi: 10.1139/cjpp-2014-0352
30. Illescas-Montes R, Melguizo-Rodriguez L, Ruiz C, et al. Vitamin D and autoimmune diseases. *Life sciences* 2019;233:116744. doi: 10.1016/j.lfs.2019.116744
31. Holick MF, Binkley NC, Bischoff-Ferrari HA, et al. Evaluation, treatment, and prevention of vitamin

- D deficiency: an Endocrine Society clinical practice guideline. *The Journal of clinical endocrinology and metabolism* 2011;96(7):1911-30. doi: 10.1210/jc.2011-0385
32. Pludowski P, Grant WB, Bhattoa HP, et al. Vitamin d status in central europe. *International journal of endocrinology* 2014;2014:589587. doi: 10.1155/2014/589587
33. Newhook LA, Sloka S, Grant M, et al. Vitamin D insufficiency common in newborns, children and pregnant women living in Newfoundland and Labrador, Canada. *Maternal & child nutrition* 2009;5(2):186-91. doi: 10.1111/j.1740-8709.2008.00157.x
34. Yoshimura N, Muraki S, Oka H, et al. Profiles of vitamin D insufficiency and deficiency in Japanese men and women: association with biological, environmental, and nutritional factors and coexisting disorders: the ROAD study. *Osteoporosis international : a journal established as result of cooperation between the European Foundation for Osteoporosis and the National Osteoporosis Foundation of the USA* 2013;24(11):2775-87. doi: 10.1007/s00198-013-2372-z
35. Hirani V, Cumming RG, Blyth FM, et al. Vitamin D status among older community dwelling men living in a sunny country and associations with lifestyle factors: the Concord Health and Ageing in Men Project, Sydney, Australia. *The journal of nutrition, health & aging* 2013;17(7):587-93. doi: 10.1007/s12603-013-0013-z
36. Faghih S, Abdolazadeh M, Mohammadi M, et al. Prevalence of vitamin d deficiency and its related factors among university students in shiraz, iran. *International journal of preventive medicine* 2014;5(6):796-9.
37. Fraser DR. Vitamin D-deficiency in Asia. *The Journal of steroid biochemistry and molecular biology* 2004;89-90(1-5):491-5. doi: 10.1016/j.jsbmb.2004.03.057
38. Yu X, Wang W, Wei Z, et al. Vitamin D status and related factors in newborns in Shanghai, China. *Nutrients* 2014;6(12):5600-10. doi: 10.3390/nu6125600
39. Wang EW, Pang MY, Siu PM, et al. Vitamin D status and cardiometabolic risk factors in young adults in Hong Kong: associations and implications. *Asia Pacific journal of clinical nutrition* 2018;27(1):231-37. doi: 10.6133/apjcn.022017.08
40. Roberts HC, Denison HJ, Martin HJ, et al. A review of the measurement of grip strength in clinical and epidemiological studies: towards a standardised approach. *Age and ageing* 2011;40(4):423-9. doi: 10.1093/ageing/afr051
41. Buysse DJ, Reynolds CF, 3rd, Monk TH, et al. The Pittsburgh Sleep Quality Index: a new instrument for psychiatric practice and research. *Psychiatry research* 1989;28(2):193-213. doi: 10.1016/0165-1781(89)90047-4
42. Bazzocchi A, Ponti F, Albisinni U, et al. DXA: Technical aspects and application. *European journal of radiology* 2016;85(8):1481-92. doi: 10.1016/j.ejrad.2016.04.004
43. Bai WY, Zhu XW, Cong PK, et al. Genotype imputation and reference panel: a systematic evaluation on haplotype size and diversity. *Brief Bioinform* 2019 doi: 10.1093/bib/bbz108
44. Genomes Project C, Auton A, Brooks LD, et al. A global reference for human genetic variation. *Nature* 2015;526(7571):68-74. doi: 10.1038/nature15393
45. McCarthy S, Das S, Kretschmar W, et al. A reference panel of 64,976 haplotypes for genotype imputation. *Nature genetics* 2016;48(10):1279-83. doi: 10.1038/ng.3643
46. Zhou BF, Cooperative Meta-Analysis Group of the Working Group on Obesity in C. Predictive values of body mass index and waist circumference for risk factors of certain related diseases in Chinese adults--study on optimal cut-off points of body mass index and waist circumference in Chinese adults. *Biomedical and environmental sciences : BES* 2002;15(1):83-96.

- 1  
2  
3 47. Asia Pacific Cohort Studies C. Central obesity and risk of cardiovascular disease in the Asia Pacific  
4 Region. *Asia Pacific journal of clinical nutrition* 2006;15(3):287-92.  
5  
6 48. Collaboration NCDRF. Worldwide trends in body-mass index, underweight, overweight, and obesity  
7 from 1975 to 2016: a pooled analysis of 2416 population-based measurement studies in 128.9  
8 million children, adolescents, and adults. *Lancet* 2017;390(10113):2627-42. doi:  
9 10.1016/S0140-6736(17)32129-3  
10  
11 49. Chen H, Jackson T. Predictors of changes in weight esteem among mainland Chinese adolescents: a  
12 longitudinal analysis. *Developmental psychology* 2009;45(6):1618-29. doi: 10.1037/a0016820  
13  
14 50. Zhang L, Qian H, Fu H. To be thin but not healthy - The body-image dilemma may affect health  
15 among female university students in China. *PloS one* 2018;13(10):e0205282. doi:  
16 10.1371/journal.pone.0205282  
17  
18 51. Krakauer NY, Krakauer JC. A new body shape index predicts mortality hazard independently of body  
19 mass index. *PloS one* 2012;7(7):e39504. doi: 10.1371/journal.pone.0039504  
20  
21 52. Thomas DM, Bredlau C, Bosy-Westphal A, et al. Relationships between body roundness with body  
22 fat and visceral adipose tissue emerging from a new geometrical model. *Obesity*  
23 2013;21(11):2264-71. doi: 10.1002/oby.20408  
24  
25 53. Mithal A, Wahl DA, Bonjour JP, et al. Global vitamin D status and determinants of hypovitaminosis  
26 D. *Osteoporosis international : a journal established as result of cooperation between the*  
27 *European Foundation for Osteoporosis and the National Osteoporosis Foundation of the USA*  
28 2009;20(11):1807-20. doi: 10.1007/s00198-009-0954-6  
29  
30 54. Zhou M, Zhuang W, Yuan Y, et al. Investigation on vitamin D knowledge, attitude and practice of  
31 university students in Nanjing, China. *Public health nutrition* 2016;19(1):78-82. doi:  
32 10.1017/S1368980015000373  
33  
34 55. Fauschou A, Beyer DM, Schmedes A, et al. The relation between sunscreen layer thickness and  
35 vitamin D production after ultraviolet B exposure: a randomized clinical trial. *The British*  
36 *journal of dermatology* 2012;167(2):391-5. doi: 10.1111/j.1365-2133.2012.11004.x  
37  
38  
39  
40  
41  
42  
43  
44  
45  
46  
47  
48  
49  
50  
51  
52  
53  
54  
55  
56  
57  
58  
59  
60

## Tables

Table 1. The participants of the cohort at baseline.

| Year  | Phase        | Area               | Total  | Sex   |        |
|-------|--------------|--------------------|--------|-------|--------|
|       |              |                    |        | Male  | Female |
| 2017  | WBBC pilot 1 | Zhejiang province  | 1,258  | 460   | 798    |
|       |              | Jiangxi province   | 2,769  | 862   | 1,907  |
|       |              | Other 25 provinces | 1,263  | 336   | 927    |
| 2018  | WBBC pilot 2 | Shandong province  | 2,920  | 1,115 | 1,805  |
|       |              | Jiangxi province   | 2,032  | 578   | 1,454  |
|       |              | Other 28 provinces | 1,306  | 438   | 868    |
| 2019  | WBBC pilot 3 | Jiangxi province   | 2,504  | 761   | 1,743  |
|       |              | Other 26 provinces | 674    | 201   | 473    |
| Total |              |                    | 14,726 | 4,751 | 9,975  |



Table 2. Summary of data collected in the Cohort.

| Measures                             | Instruments                                                                                                                |
|--------------------------------------|----------------------------------------------------------------------------------------------------------------------------|
| Anthropometry*                       | Height and weight, bust, waist, hip and thigh circumference                                                                |
| Strength                             | Grip strength (right and left hand)                                                                                        |
| Cardiovascular system                | Blood pressure (SBP & DBP), heart rate                                                                                     |
| Bone mineral density                 | Lumar spine, hip and forearm                                                                                               |
| Questionnaires                       |                                                                                                                            |
| Demographic data                     | Age, sex, ethnicity, family economic status, birthplace                                                                    |
| Menstrual history (for female)       | Age of menarche, Gynaecological disease history                                                                            |
| Sleeping situation                   | Pittsburgh sleep quality index, PSQI                                                                                       |
| Lifestyle                            | Smoking status, alcohol, tea and coffee consumption, exercise                                                              |
| Supplementations                     | Calcium, vitamin D                                                                                                         |
| Health status                        | Medical history and medications                                                                                            |
| Physical activity <sup>#</sup>       | International Physical Activity Questionnaire, IPAQ                                                                        |
| Dietary pattern <sup>#</sup>         | Semi-Quantitative Food Frequency Questionnaire (SQFFQ)                                                                     |
| Routine biochemistry and Haematology |                                                                                                                            |
| Lipid metabolism                     | Total cholesterol, triglycerides, HDL-cholesterol, LDL-cholesterol                                                         |
| Kidney-related measures              | uric acid, creatinine and urea                                                                                             |
| Hepatic-related measures             | Alanine aminotransferase, glutamic oxaloacetylase, total bilirubin, direct bilirubin, albumin, globulin                    |
| Thyroid and parathyroid function     | TSH, PTH, T3, T4, FT3, FT4,                                                                                                |
| Routine diabetes test                | Fasting plasma glucose, glycosylated hemoglobin (HbA1c)                                                                    |
| Bone-related measures                | Bone turnover markers (Osteocalcin, PINP, NBAP and $\beta$ -CTX), serum 1,25(OH) <sub>2</sub> D <sub>3</sub> , serum IGF-1 |
| Mineral elements                     | Calcium (Ca), phosphorus (P) and magnesium (Mg)                                                                            |
| Samples                              |                                                                                                                            |
| Blood                                | 25 ml                                                                                                                      |
| Serum                                | 2 ml                                                                                                                       |
| Urine <sup>#</sup>                   | 10 ml                                                                                                                      |
| Faeces <sup>#</sup>                  | 15 g                                                                                                                       |

\* Direct measures carried out by trained interviewers according to standardized protocols; # measured only on WBBC pilot 3; BAP: Bone alkaline phosphatase; DBP: Diastolic blood pressure; FT3: free Triiodothyronine; FT4: free Tetraiodothyronine; HDL: High-density lipoprotein; IGF-1: Insulin-like growth factor 1; LDL: Low-density lipoprotein; PINP: N-terminal propeptide of procollagen type I; PTH: Parathyroid hormone; SBP: Systolic blood pressure; T3: Triiodothyronine; T4: Tetraiodothyronine; TSH: Thyroid stimulating hormone;  $\beta$ -CTx:  $\beta$ -isomerized C-terminal telopeptides

Table 3. List of anthropometric collected and platforms for biochemical tests at baseline in the cohort.

| <b>Variables</b>                           | <b>Analysis method/platform used</b>                    |
|--------------------------------------------|---------------------------------------------------------|
| Height and weight                          | Ultrasonic surveying instrument, Beryl BYH01, China     |
| Waist, hip and thigh circumference         | Manufactured instrument (tape)                          |
| Resting blood pressure                     | Electronic sphygmomanometer, Yuwell YE660A, China       |
| Heart rate                                 | Electronic sphygmomanometer, Yuwell YE660A, China       |
| Grip strength                              | Digital hand dynamometer, CAMRY EH101, China            |
| Bone mineral density (BMD)                 | DXA, Discovery QDR 4500, Hologic Inc., Waltham, MA, USA |
| Blood routine (5 items)                    | SYSMEX 2100, Japan                                      |
| Serum IGF-1                                | CLIA, DPC immulite 2000, Siemens, Germany               |
| Serum calcium, phosphorus                  | ARCHITECT C16000, Abbott, USA                           |
| Fasting blood glucose                      | Cobas c501, Roche, Switzerland                          |
| Bone turnover markers                      | ECLIA, Cobas e602, Roche, Switzerland                   |
| Serum 1,25(OH) <sub>2</sub> D <sub>3</sub> | LC-MS/MS, AB Sciex API 4000™, USA                       |
| Thyroid and parathyroid function           | Chemical luminescence, ARCHITECT System i2000, USA      |
| Lipid metabolism                           | ARCHITECT C16000, Abbott, USA                           |
| Kidney-related measures                    | ARCHITECT C16000, Abbott, USA                           |
| Hepatic-related measures                   | ARCHITECT C16000, Abbott, USA                           |

CLIA: chemiluminescent immunoassay; ECLIA: electrochemoluminescence immunoassay;

LC-MS/MS: Liquid chromatography-tandem mass spectrometry.

Table 4. Basic characteristics of participants in baseline of WBBC pilot.

| Variables(unit)              |                     | Total          | Sex           |               | *P value |
|------------------------------|---------------------|----------------|---------------|---------------|----------|
|                              |                     |                | Male          | Female        |          |
| <b>Socio-demographic</b>     |                     |                |               |               |          |
| Age (years)                  | N <sup>a</sup>      | 14,726         | 4,751         | 9,975         | 0.001    |
|                              | M (SD) <sup>b</sup> | 18.50 (1.25)   | 18.55 (1.21)  | 18.48 (1.26)  |          |
| Gender                       | N (%) <sup>c</sup>  | 14,726 (100)   | 4,751 (32.26) | 9,975 (67.74) | <0.001   |
| Ethnicity                    |                     |                |               |               | 0.305    |
| <i>Han</i>                   | N (%)               | 11,136 (97.78) | 3,642 (97.98) | 7,494 (97.68) |          |
| <i>Others</i>                | N (%)               | 253 (2.22)     | 75 (2.12)     | 178 (2.32)    |          |
| Hukou status                 |                     |                |               |               | <0.001   |
| <i>Rural</i>                 | N (%)               | 5,951 (66.59)  | 1,739 (60.24) | 4,212 (69.62) |          |
| <i>Urban</i>                 | N (%)               | 2,986(33.41)   | 1,148 (39.76) | 1,838 (30.38) |          |
| <b>Anthropometry</b>         |                     |                |               |               |          |
| Height (cm)                  | N                   | 14,277         | 4,588         | 9,689         | <0.001   |
|                              | M (SD)              | 164.24 (8.49)  | 172.92 (6.57) | 160.13 (5.76) |          |
| Weight (kg)                  | N                   | 14,279         | 4,587         | 9,692         | <0.001   |
|                              | M (SD)              | 57.01 (12.32)  | 65.81 (13.60) | 52.85 (9.07)  |          |
| Waist (cm)                   | N                   | 12,396         | 3,905         | 8,491         | <0.001   |
|                              | M (SD)              | 71.67 (9.84)   | 75.51 (11.07) | 69.90 (8.66)  |          |
| Hip (cm)                     | N                   | 12,388         | 3,902         | 8,486         | <0.001   |
|                              | M (SD)              | 89.75 (7.28)   | 90.75 (8.28)  | 89.29 (6.73)  |          |
| Thigh (cm)                   | N                   | 12,351         | 3,880         | 8,471         | 0.102    |
|                              | M (SD)              | 51.68 (5.69)   | 51.56 (6.50)  | 51.74 (5.27)  |          |
| <b>Cardiovascular system</b> |                     |                |               |               |          |
| SBP (mmHg)                   | N                   | 14,277         | 4,595         | 9,682         | <0.001   |
|                              | M (SD)              | 113 (12)       | 121 (12)      | 110 (11)      |          |
| DBP (mmHg)                   | N                   | 14,276         | 4,595         | 9,681         | <0.001   |
|                              | M (SD)              | 71 (9)         | 73 (9)        | 70 (8)        |          |
| Heart rate (beats/minute)    | N                   | 14,295         | 4,599         | 9,696         | <0.001   |
|                              | M (SD)              | 86 (13)        | 83 (13)       | 87 (13)       |          |
| <b>Lifestyle</b>             |                     |                |               |               |          |
| Smoking                      | N (%)               | 435 (5.94)     | 350 (16.29)   | 85 (1.64)     | <0.001   |
| Alcohol consumption          | N (%)               | 2,844 (38.82)  | 1,333 (62.03) | 1,511 (29.19) | <0.001   |
| Sleeping time (hours)        | N                   | 7,247          | 2,115         | 5,132         |          |
|                              | M (SD)              | 8.23 (1.37)    | 7.97 (1.26)   | 8.34 (1.40)   | <0.001   |
| <b>Grip strength (kg)</b>    |                     |                |               |               |          |

|                               |        |               |               |               |        |
|-------------------------------|--------|---------------|---------------|---------------|--------|
|                               | N      | 8,932         | 2,958         | 5,974         | <0.001 |
| Left hand                     | M (SD) | 27.38 (8.77)  | 36.66 (7.53)  | 22.79 (4.82)  |        |
|                               | N      | 8,941         | 2,967         | 5,974         | <0.001 |
| Right hand                    | M (SD) | 29.76 (9.66)  | 39.90 (8.32)  | 24.72 (5.35)  |        |
| <b>BMD (g/cm<sup>2</sup>)</b> |        |               |               |               |        |
|                               | N      | 10,154        | 3,293         | 6,861         | <0.001 |
| Lumbar spine                  | M (SD) | 0.910 (0.105) | 0.926 (0.112) | 0.903(0.100)  |        |
|                               | N      | 10,160        | 3,296         | 6,864         | <0.001 |
| Total hip                     | M (SD) | 0.868 (0.127) | 0.932 (0.139) | 0.837 (0.108) |        |
|                               | N      | 10,160        | 3,296         | 6,864         | <0.001 |
| Femoral neck                  | M (SD) | 0.778 (0.125) | 0.846 (0.138) | 0.746 (0.104) |        |
|                               | N      | 9,917         | 3,238         | 6,679         | <0.001 |
| Forearm                       | M (SD) | 0.657 (0.059) | 0.705 (0.057) | 0.634 (0.453) |        |

<sup>a</sup> N: sample size; <sup>b</sup>M (SD): mean (standard deviation); <sup>c</sup>N (%): sample size (percentage); \* T-test and Chi-square tests for continuous and categorical variables respectively to refer the significant differences between males and females; DBP: Diastolic blood pressure; SBP: Systolic blood pressure.

Table 5. Distribution of BMI or waist by sex in participants in WBBC pilot, 2017-2019. N=14,264.

| Variables                            | Total          | Male           | Female         | #P      |
|--------------------------------------|----------------|----------------|----------------|---------|
| Underweight, N (%)                   | 3,460 (24.26%) | 903 (19.70%)   | 2,557 (26.41%) | <0.0001 |
| Normal, N (%)                        | 8,446 (59.21%) | 2,507 (54.70%) | 5,939 (61.35%) | <0.0001 |
| Overweight, N (%)                    | 1,640 (11.50%) | 766 (16.71%)   | 874 (9.03%)    | <0.0001 |
| Obesity, N (%)                       | 718 (5.03%)    | 407 (8.88%)    | 311 (3.21%)    | <0.0001 |
| Central Obesity <sup>δ</sup> , N (%) | 1,812 (14.62%) | 746 (19.10%)   | 1,066 (12.55%) | <0.0001 |

<sup>δ</sup> Total sample size for Central Obesity was 12,396. # Chi-square tests was calculated between male and female.

For peer review only

Table 6. Distribution of Vitamin D level by sex in subjects in WBBC pilot, 2017-2018. N=11,370.

| Variables                                      | Total          | Male           | Female         | P                    |
|------------------------------------------------|----------------|----------------|----------------|----------------------|
| Serum 1,25(OH)D, mean (SD)                     | 22.39 (5.33)   | 25.15 (5.43)   | 21.05 (4.73)   | <0.0001 <sup>¶</sup> |
| Vitamin D deficient, N (%)                     | 3,806 (33.47%) | 610 (16.35%)   | 3,196 (41.83%) | <0.0001 <sup>#</sup> |
| Vitamin D insufficient, N (%)                  | 6,614 (58.17%) | 2,452 (65.74%) | 4,162 (54.48%) | <0.0001 <sup>#</sup> |
| Vitamin D sufficient, N (%)                    | 950 (8.36%)    | 668 (17.91%)   | 282 (3.69%)    | <0.0001 <sup>#</sup> |
| Vitamin D supplementation <sup>δ</sup> , N (%) | 164 (2.24%)    | 67 (3.12%)     | 97 (1.87%)     | 0.00098 <sup>#</sup> |

<sup>δ</sup> The sample size for Vitamin D supplementation was 7,326. <sup>#</sup> Chi-square tests was calculated between male and female. <sup>¶</sup> T-test was calculated between male and female.

For peer review only

Table 7. Participants' general react about activity status in WBBC pilot, 2017-2018. N=7,326.<sup>a</sup>

|                                                      | Total          | Male           | Female         |
|------------------------------------------------------|----------------|----------------|----------------|
| What would you like to do in spare time?             |                |                |                |
| <i>Stay indoors</i>                                  | 6,364 (86.87%) | 1,754 (81.62%) | 4,610 (89.05%) |
| <i>Take part in some activities</i>                  | 962 (13.13%)   | 395 (18.38%)   | 567 (10.95%)   |
| Do you do exercise initiatively?                     |                |                |                |
| <i>Yes</i>                                           | 4,296 (58.64%) | 1,517 (70.59%) | 2,779 (53.68%) |
| <i>No</i>                                            | 3,030 (41.36%) | 632 (29.41%)   | 2,398 (46.32%) |
| How often do you have outdoor activities every week? |                |                |                |
| <i>Hardly</i>                                        | 2,785 (38.02%) | 477 (22.20%)   | 2,308 (44.58%) |
| <i>Occasionally</i>                                  | 3,865 (52.76%) | 1,301 (60.54%) | 2,564 (49.53%) |
| <i>Often</i>                                         | 676 (9.23%)    | 371 (17.26%)   | 305 (5.89%)    |

<sup>a</sup> Data are showed as n (%) of participants.

## Figure legend

Figure 1. Maps showing the sources of the samples in the Westlake BioBank for Chinese (WBBC) pilot cohort. AH: Anhui province; BJ: Beijing; CQ: Chongqing; FJ: Fujian province; GD: Guangdong province; GS: Gansu province; GX: Guangxi Autonomous Region; GZ: Guizhou province; HA: Henan province; HB: Hubei province; HE: Hebei province; HI: Hainan province; HL: Heilongjiang province; HN: Hunan province; JL: Jilin province; JS: Jiangsu province; JX: Jiangxi province; LN: Liaoning province; NM: Neimeng Autonomous Region; NX: Ningxia Autonomous Region; QH: Qinghai province; SC: Sichuan province; SD: Shandong province; SH: Shanghai; SN: Shanxi province; SX: Shanxi province; TJ: Tianjin; XJ: Xinjiang Autonomous Region; XZ: Xizang Autonomous Region; YN: Yunnan province; ZJ: Zhejiang province.

Figure 2. Data collection timeline. IPAQ: International Physical Activity Questionnaire; PA: Physical Activity; PSQI: Pittsburgh sleep quality index; SQFFQ: Semi-Quantitative Food Frequency Questionnaire.

Figure 3. Flow diagram of main blood biochemical detection and blood conservation. RCF: relative centrifugal force; WGS: whole genome sequence.



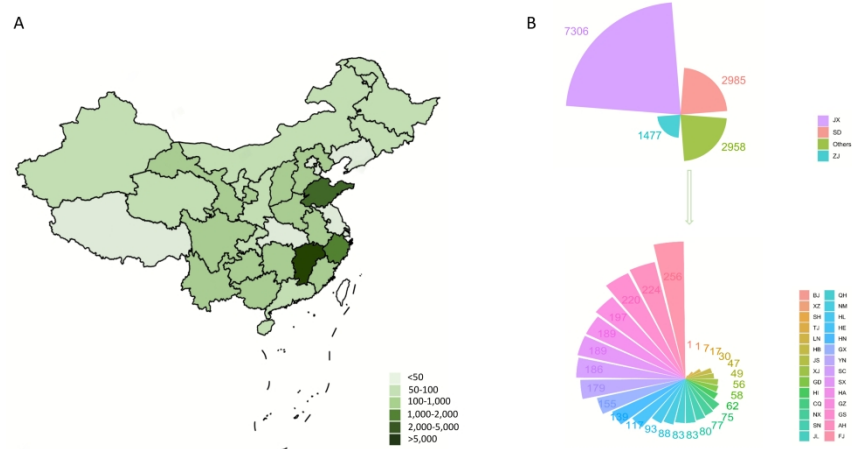

Figure 1. Maps showing the sources of the samples in the Westlake BioBank for Chinese (WBBC) pilot cohort. AH: Anhui province; BJ: Beijing; CQ: Chongqing; FJ: Fujian province; GD: Guangdong province; GS: Gansu province; GX: Guangxi Autonomous Region; GZ: Guizhou province; HA: Henan province; HB: Hubei province; HE: Hebei province; HI: Hainan province; HL: Heilongjiang province; HN: Hunan province; JL: Jilin province; JS: Jiangsu province; JX: Jiangxi province; LN: Liaoning province; NM: Neimeng Autonomous Region; NX: Ningxia Autonomous Region; QH: Qinghai province; SC: Sichuan province; SD: Shandong province; SH: Shanghai; SN: Shanxi province; SX: Shanxi province; TJ: Tianjin; XJ: Xinjiang Autonomous Region; XZ: Xizang Autonomous Region; YN: Yunnan province; ZJ: Zhejiang province.

338x190mm (300 x 300 DPI)

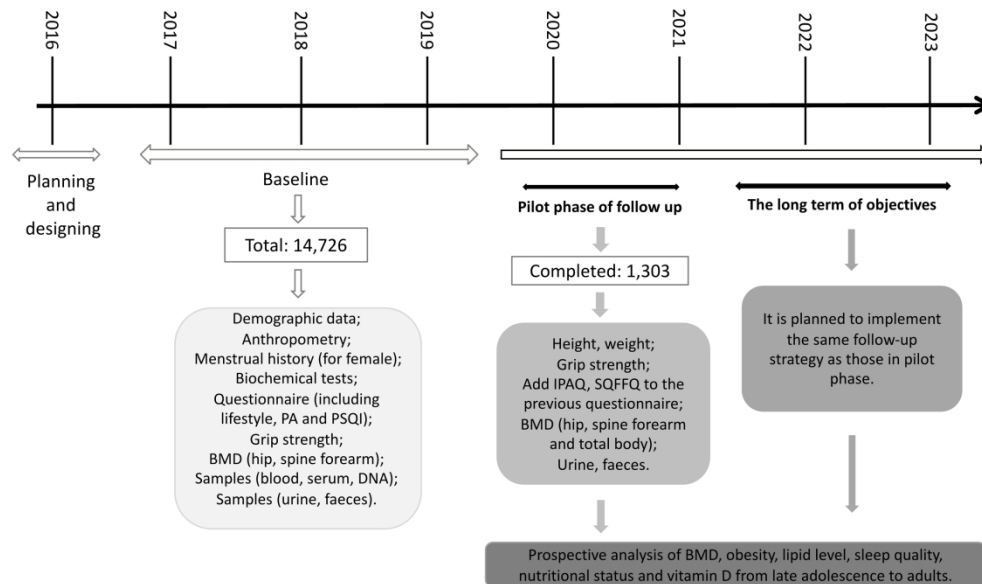

Figure 2. Data collection timeline. IPAQ: International Physical Activity Questionnaire; PA: Physical Activity; PSQI: Pittsburgh sleep quality index; SQFFQ: Semi-Quantitative Food Frequency Questionnaire.

254x190mm (300 x 300 DPI)

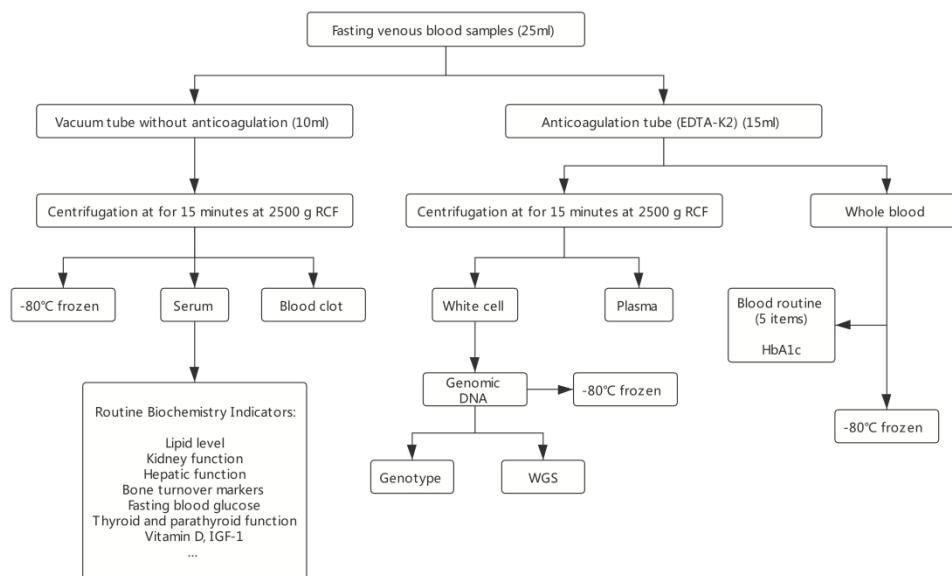

Figure 3. Flow diagram of main blood biochemical detection and blood conservation.  
RCF: relative centrifugal force; WGS: whole genome sequence.

363x223mm (300 x 300 DPI)

# BMJ Open

## Cohort profile: the Westlake BioBank for Chinese (WBBC) pilot project

|                                 |                                                                                                                                                                                                                                                                                                                                                                                                                                                                                                                                                                                                                                                                                                                                                                                                                                                                                                                                                                                                                                                                                                                                                                                                                                                                                                                                                                                                                                                             |
|---------------------------------|-------------------------------------------------------------------------------------------------------------------------------------------------------------------------------------------------------------------------------------------------------------------------------------------------------------------------------------------------------------------------------------------------------------------------------------------------------------------------------------------------------------------------------------------------------------------------------------------------------------------------------------------------------------------------------------------------------------------------------------------------------------------------------------------------------------------------------------------------------------------------------------------------------------------------------------------------------------------------------------------------------------------------------------------------------------------------------------------------------------------------------------------------------------------------------------------------------------------------------------------------------------------------------------------------------------------------------------------------------------------------------------------------------------------------------------------------------------|
| Journal:                        | <i>BMJ Open</i>                                                                                                                                                                                                                                                                                                                                                                                                                                                                                                                                                                                                                                                                                                                                                                                                                                                                                                                                                                                                                                                                                                                                                                                                                                                                                                                                                                                                                                             |
| Manuscript ID                   | bmjopen-2020-045564.R1                                                                                                                                                                                                                                                                                                                                                                                                                                                                                                                                                                                                                                                                                                                                                                                                                                                                                                                                                                                                                                                                                                                                                                                                                                                                                                                                                                                                                                      |
| Article Type:                   | Cohort profile                                                                                                                                                                                                                                                                                                                                                                                                                                                                                                                                                                                                                                                                                                                                                                                                                                                                                                                                                                                                                                                                                                                                                                                                                                                                                                                                                                                                                                              |
| Date Submitted by the Author:   | 23-Mar-2021                                                                                                                                                                                                                                                                                                                                                                                                                                                                                                                                                                                                                                                                                                                                                                                                                                                                                                                                                                                                                                                                                                                                                                                                                                                                                                                                                                                                                                                 |
| Complete List of Authors:       | Zhu, Xiao-Wei; Westlake University, Diseases & Population (DaP) Geninfo Lab; Fudan University, School of Life Sciences<br>Liu, Ke-Qi ; Jiangxi Medical College<br>Wang, Ping-Yu; Department of Epidemiology & Department of Biochemistry and Molecular Biology, Binzhou Medical University, Yantai, Shandong 264003, China<br>Liu, Jun-Quan; Hangzhou Kingmed Diagnostics Co.<br>Chen, Jin-Yang; Zhejiang Healthfuture Institute for Cell-Based Applied Technology<br>Xu, Xue-Jin; Jiading District Center for Disease Control and Prevention<br>Xu, Jin-Jian; Jiangxi Medical College<br>Qiu, Mo-Chang; Jiangxi Medical College<br>Sun, Yi; Hangzhou Kingmed Diagnostics Co.<br>Liu, Chu; Hangzhou Normal University<br>Bai, Wei-Yang; Westlake University, Diseases & Population (DaP) Geninfo Lab; Fudan University, School of Life Sciences<br>Zhao, Pian-Pian; Westlake University School of Life Sciences, Diseases & Population (DaP) Geninfo Lab<br>Xia, Jiangwei; Westlake University, Diseases & Population (DaP) Geninfo Lab<br>Gai, Si-Rui ; Westlake University, Diseases & Population (DaP) Geninfo Lab<br>Guan, Peng-Lin; Westlake University, Diseases & Population (DaP) Geninfo Lab<br>Qian, Yu; Westlake University, Diseases & Population (DaP) Geninfo Lab<br>Cong, Pei-Kuan Cong; Westlake University, Diseases & Population (DaP) Geninfo Lab<br>Xie, Shu-Yang ; Binzhou Medical University<br>Zheng, Hou-Feng; Westlake University, |
| <b>Primary Subject Heading</b>: | Epidemiology                                                                                                                                                                                                                                                                                                                                                                                                                                                                                                                                                                                                                                                                                                                                                                                                                                                                                                                                                                                                                                                                                                                                                                                                                                                                                                                                                                                                                                                |
| Secondary Subject Heading:      | Epidemiology, Paediatrics, Public health                                                                                                                                                                                                                                                                                                                                                                                                                                                                                                                                                                                                                                                                                                                                                                                                                                                                                                                                                                                                                                                                                                                                                                                                                                                                                                                                                                                                                    |
| Keywords:                       | EPIDEMIOLOGY, NUTRITION & DIETETICS, Health informatics < BIOTECHNOLOGY & BIOINFORMATICS                                                                                                                                                                                                                                                                                                                                                                                                                                                                                                                                                                                                                                                                                                                                                                                                                                                                                                                                                                                                                                                                                                                                                                                                                                                                                                                                                                    |
|                                 |                                                                                                                                                                                                                                                                                                                                                                                                                                                                                                                                                                                                                                                                                                                                                                                                                                                                                                                                                                                                                                                                                                                                                                                                                                                                                                                                                                                                                                                             |

1  
2  
3  
4  
5  
6  
7  
8  
9  
10  
11  
12  
13  
14  
15  
16  
17  
18  
19  
20  
21  
22  
23  
24  
25  
26  
27  
28  
29  
30  
31  
32  
33  
34  
35  
36  
37  
38  
39  
40  
41  
42  
43  
44  
45  
46  
47  
48  
49  
50  
51  
52  
53  
54  
55  
56  
57  
58  
59  
60

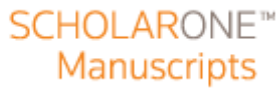

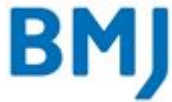

I, the Submitting Author has the right to grant and does grant on behalf of all authors of the Work (as defined in the below author licence), an exclusive licence and/or a non-exclusive licence for contributions from authors who are: i) UK Crown employees; ii) where BMJ has agreed a CC-BY licence shall apply, and/or iii) in accordance with the terms applicable for US Federal Government officers or employees acting as part of their official duties; on a worldwide, perpetual, irrevocable, royalty-free basis to BMJ Publishing Group Ltd ("BMJ") its licensees and where the relevant Journal is co-owned by BMJ to the co-owners of the Journal, to publish the Work in this journal and any other BMJ products and to exploit all rights, as set out in our [licence](#).

The Submitting Author accepts and understands that any supply made under these terms is made by BMJ to the Submitting Author unless you are acting as an employee on behalf of your employer or a postgraduate student of an affiliated institution which is paying any applicable article publishing charge ("APC") for Open Access articles. Where the Submitting Author wishes to make the Work available on an Open Access basis (and intends to pay the relevant APC), the terms of reuse of such Open Access shall be governed by a Creative Commons licence – details of these licences and which [Creative Commons](#) licence will apply to this Work are set out in our licence referred to above.

Other than as permitted in any relevant BMJ Author's Self Archiving Policies, I confirm this Work has not been accepted for publication elsewhere, is not being considered for publication elsewhere and does not duplicate material already published. I confirm all authors consent to publication of this Work and authorise the granting of this licence.

## Cohort profile: the Westlake BioBank for Chinese (WBBC) pilot project

Xiao-Wei Zhu<sup>1,2,3</sup>, Ke-Qi Liu<sup>4</sup>, Ping-Yu Wang<sup>5</sup>, Jun-Quan Liu<sup>6,7</sup>, Jin-Yang Chen<sup>7</sup>,  
Xue-Jin Xu<sup>8</sup>, Jin-Jian Xu<sup>4</sup>, Mo-Chang Qiu<sup>4</sup>, Yi Sun<sup>6</sup>, Chun Liu<sup>9</sup>, Wei-Yang Bai<sup>1,2,3</sup>,  
Pian-Pian Zhao<sup>1,2</sup>, Jiangwei Xia<sup>1,2</sup>, Si-Rui Gai<sup>1,2</sup>, Peng-Lin Guan<sup>1,2</sup>, Yu Qian<sup>1,2</sup>,  
Pei-Kuan Cong<sup>1,2</sup>, Shu-Yang Xie<sup>5</sup>, Hou-Feng Zheng<sup>1,2,3\*</sup>

<sup>1</sup> Disease & Population (DaP) Geninfo Lab, School of Life Sciences, Westlake University, Hangzhou, Zhejiang, 310024, China

<sup>2</sup> Institute of Basic Medical Sciences, Westlake Institute for Advanced Study, Westlake University, Hangzhou, Zhejiang, 310024, China

<sup>3</sup> Westlake Laboratory of Life Sciences and Biomedicine, Hangzhou, Zhejiang, 310024, China

<sup>4</sup> WBBC Jiangxi Center, Jiangxi Medical College, Shangrao, Jiangxi, China

<sup>5</sup> Department of Epidemiology & Department of Biochemistry and Molecular Biology, Binzhou Medical University, Yantai, Shandong 264003, China

<sup>6</sup> Hangzhou Kingmed Diagnostics Co., Ltd., Hangzhou, Zhejiang, 310053, China

<sup>7</sup> Research and Development Department, Zhejiang Healthfuture Institute for Cell-Based Applied Technology, Hangzhou, Zhejiang, China

<sup>8</sup> Center for Disease Control and Prevention of Jiading District, Shanghai, China

<sup>9</sup> Department of Health Management, Hangzhou Normal University, Hangzhou, Zhejiang, 311121, China

\*Corresponding author: Hou-Feng Zheng. E-mail: zhenghoufeng@westlake.edu.cn

## 1 ABSTRACT

2 **Purpose:** The Westlake BioBank for Chinese (WBBC) pilot cohort is a  
3 population-based prospective study with its major purpose to better understand the  
4 effect of genetic and environmental factors on growth and development from  
5 adolescents to adults.

6 **Participants:** A total of 14,726 participants (4,751 males and 9,975 females) aged 14  
7 - 25 years were recruited and the baseline survey was carried out from 2017 to 2019.  
8 The pilot cohort contains rich range of information regarding of demographics and  
9 anthropometric measurements, lifestyle and sleep patterns, clinical and health  
10 outcomes. Please visit the WBBC website for more information  
11 (<https://wbcc.westlake.edu.cn/index.html>).

12 **Findings to date:** The mean age of study sample were 18.6 years for males and 18.5  
13 years for females, respectively. The mean height and weight were 172.9 cm and 65.81  
14 kg for males, and 160.1 cm and 52.85 kg for females. Results indicated that the  
15 prevalence of underweight in female was much higher than male, but the prevalence  
16 of overweight and obesity in female was lower than male. The mean of serum  
17 25(OH)D level in the 14,726 young participants was  $22.4 \pm 5.3$  ng/ml, and male had a  
18 higher level of serum 25(OH)D than female, overall, 33.5% of the participants had  
19 vitamin D deficiency and even more participants suffered from vitamin D  
20 insufficiency (58.2%). The proportion of deficiency in females was much higher than  
21 that in males (41.8 vs. 16.4%). The issue of underweight and vitamin D deficiency in  
22 young people should be paid attention, especially in females. These results reflected  
23 the fact that thinness and paler skin are preferred in modern aesthetics of Chinese  
24 culture.

25 **Future plans:** WBBC pilot is designed as a prospective cohort study and provides a  
26 unique and rich data set analyzing health trajectories from adolescents to young  
27 adults. WBBC will continue to collect samples with old age.

28  
29 Key words: Cohort, Late adolescence, Nutrition, Obesity.



## 30 **Strengths and limitations**

31 This is a comprehensive cohort study to pay attention to the health of adolescence and  
32 young adults, including over ~14,000 participants.

33  
34 The WBBC pilot cohort is rich in longitudinal phenotypic data and archived  
35 biospecimens, including whole blood and serum as well as DNA samples. These  
36 resources will facilitate to digitize the information of the genomic, proteomic and  
37 metabolomic and microbiome of the participants.

38  
39 Although the participants covered all around the country, most of them were mainly  
40 from 3 provinces (Jiangxi, Shandong and Zhejiang), and the selection of participants  
41 was not random.

42  
43 The participants were collected in 3 phases at different time points, the phenotypic  
44 data were not always uniform in 3 phases.

## 45 **Introduction**

46 The Westlake BioBank for Chinese (WBBC) cohort is a population-based prospective  
47 study with its major purpose to better understand the effect of genetic and  
48 environmental factors on growth and development from adolescents to adults. WBBC  
49 is designed as a large-scale prospective cohort with its aim of recruiting at least  
50 100,000 Chinese samples at different age. The pilot project of WBBC has focused on  
51 the study on the young population (Late adolescence), and has already collected a  
52 wide range of information including demographics and anthropometric measures,  
53 serological tests, physical activity, sleep quality, age at menarche and bone mineral  
54 density etc. The main purpose of this particular paper is to profile the cohort,  
55 therefore, only limited findings were reported and few questions were asked, e.g. (1)  
56 what is the prevalence of underweight, overweight, obesity and vitamin D deficiency  
57 in Chinese late adolescence? What is the reference value of serum vitamin D level  
58 with the young people? (2) what is the difference between male and female in term of  
59 height, weight, blood pressure, lifestyle and bone health in the young people.

60  
61 It is known that adolescence is a period of life with marked psychosocial, behavioral  
62 and biological changes[1], therefore, monitoring the trajectories of health-risk  
63 behaviors in adolescents is one of the important concerns of public health. Among  
64 health problems during adolescence, overweight and obesity are highly prevalent[2 3].  
65 Following the rapid economic development since the 1980s, China experiences a  
66 rapidly increasing of overweight and obesity among children and adolescents[4 5]. In  
67 2019, a cross-sectional study[6] found that the prevalence of overweight in college  
68 students (aged 18-26 years) was 8.0%, and the prevalence of obesity was 3.5%. A  
69 recent study from 12 provinces in China showed that the prevalence of overweight  
70 and obesity were 14.0% and 10.5% in boys, and 9.7% and 7.1% in girls,  
71 respectively[7]. And obesity, in adolescence conferred very high risks for obesity in  
72 adults[2]; 70% of overweight adolescents had one or more concomitant conditions  
73 such as high blood pressures and fasting insulin, which were also risk factors for

1  
2  
3  
4 74 cardiovascular disease, and 23% of those accompanied with three or more  
5  
6 75 concomitant conditions[8]. Further, elevated body mass index (BMI) in adolescence  
7  
8 76 had been associated with several obesity-related morbidities in adult life, such as  
9  
10 77 diabetes, metabolic syndromes and some types of cancer[9]. However, little is known  
11  
12 78 about how underweight or severe low BMI could affect the health in adolescence,  
13  
14 79 what are the long-term medical consequences. In adolescents, underweight was  
15  
16 80 reported to be associated with scoliosis[10], pubertal delay[11], and psychiatric  
17  
18 81 disorders[12]. Therefore, in this study, it is also important to recognize the issue of  
19  
20 82 underweight in adolescents.

21 83  
22  
23 84 Hypovitaminosis D in children and adolescents is another re-emerging public health  
24  
25 85 problem[13]. Besides its effect on the musculoskeletal system, Vitamin D showed a  
26  
27 86 pleiotropic effect on human health, such as cardiovascular diseases[14], common  
28  
29 87 infectious diseases[15] and autoimmune diseases[16]. Serum 25(OH)D is a good  
30  
31 88 indicator of vitamin D storage and is an optimal method of assessing vitamin D  
32  
33 89 levels[17]. According to the Endocrine Society clinical practice guidelines, vitamin D  
34  
35 90 levels were defined as a deficiency [25(OH)D<20 ng/mL], insufficiency [25(OH)D:  
36  
37 91 20-29 ng/mL] and sufficiency [25(OH)D≥30 ng/mL] respectively[18]. Many people  
38  
39 92 in central and western Europe had vitamin D concentration of 11–20 ng/mL in winter  
40  
41 93 [19]. Studies from other countries, including Canada[20], Japan[21], Australia[22]  
42  
43 94 and Iran[23], presented similar situations, with high prevalence of vitamin D  
44  
45 95 insufficiency in different ethnicities. A study in northern China found that more than  
46  
47 96 40% of adolescent girls had Vitamin D-deficient in the winter[24]. Another study in  
48  
49 97 Shanghai showed that more than one-third newborns had plasma 25(OH)D less than  
50  
51 98 20 ng/mL[25]. Even in Hong Kong (latitude 22° north), 72% of young adults were  
52  
53 99 reported to have vitamin D deficiency[26]. To the best of our knowledge, there was  
54  
55 100 no large survey to assess levels of vitamin D deficiency in adolescents in China  
56  
57 101 mainland; however, findings from some surveys suggest that vitamin D deficiency is  
58  
59 102 prevalent in young people[26-28]. Moreover, the problem of vitamin D deficiency  
60  
103 among young people in China has not been paid sufficient attention.

1  
2  
3  
4 104

5 105 The overall goal of the Westlake Biobank for Chinese (WBBC) pilot cohort is to  
6 106 recruit individuals at their late adolescence/young adulthood. The biological samples  
7 107 such as whole blood, serum, urine and faeces were collected, genomic DNA was  
8 108 extracted and the DNA sequence information was acquired through sequencing  
9 109 technique. A long questionnaire with questions concerning the environmental factors  
10 110 such as nutrition, sleep quality, physical activity, medication etc was provided. These  
11 111 data will help us to understand the association between the genetics, environmental  
12 112 factors, microbiome and health statue of adolescence population. With a broad range  
13 113 of phenotype collection on many aspects of participants' daily life, a wide range of  
14 114 scientific questions could be addressed.  
15 115

## 116 **Cohort description**

### 117 **Sampling Design**

118 The Westlake Biobank for Chinese (WBBC) pilot study was collected in three main  
119 regions in China (Zhejiang province, Jiangxi province and Shandong province), but  
120 the participants covered all around the country (Table 1 and Figure 1). The baseline  
121 survey was carried out from 2017 to 2019. The target population was young people  
122 aged 14–25 years who were college students and available for follow-up studies. In  
123 the first phase of baseline (WBBC pilot 1), the participants were recruited from two  
124 colleges at Zhejiang province and Jiangxi province in Southeast China from  
125 September 2017 to March 2018 (Figure 2), and 1,258 and 2,769 participants were  
126 from Zhejiang and Jiangxi provinces, respectively, and 1,263 participants were from  
127 other 25 provinces of China (Table 1). From September 2018 to December 2018, the  
128 second phase of WBBC pilot project was initiated (WBBC pilot 2), the participants  
129 were recruited at the same college in Jiangxi province and a college in Shandong  
130 province in Northeast China (Figure 2). There were 2,920 participants from Shandong  
131 province, 2,032 participants from Jiangxi province and 1,306 participants from other  
132 28 provinces of China in WBBC pilot 2 (Table 1). From September 2019, the WBBC

1  
2  
3  
4 133 pilot project phase 3 (WBBC pilot 3) recruited participants from the same college in  
5  
6 134 Jiangxi province (Figure 2), most of the participants (2,504) of WBBC pilot 3 were  
7  
8 135 from Jiangxi province and 674 participants were from other 26 provinces of China  
9  
10 136 (Table 1). All participants provided their Chinese unique national identity (ID)  
11  
12 137 number for unique reference at the health examination center in the campus. The  
13  
14 138 inclusion criteria were: a). All study participants signed the informed consent form  
15  
16 139 before taking part in the survey. b). Participants should complete the physical  
17  
18 140 examination, and should finish at least one of other items including bone mineral  
19  
20 141 density scan, blood test and questionnaire. And the exclusion criteria were: a). Age <  
21  
22 142 14 year old or > 25 year old. b). Participants have taken drugs which could affect bone  
23  
24 143 metabolism (e.g. glucocorticoids). c). Participants have illness which could cause  
25  
26 144 secondary osteoporosis (e.g. Hyperparathyroidism). In WBBC pilot 3, the urine and  
27  
28 145 faeces of the participants were collected, therefore, participants taking antibiotics  
29  
30 146 should be excluded.

31 147

### 32 148 **Data Collection Procedures**

33  
34  
35 149 The WBBC pilot study is a multidisciplinary study and contains a rich range of  
36  
37 150 information regarding of demographics, anthropometric measurements, blood  
38  
39 151 pressure and heart rate, lifestyle and sleep patterns, biological, clinical and health  
40  
41 152 outcomes. Genomic data are available for 7,033 participants. Data and samples were  
42  
43 153 collected via examinations, questionnaire and venipuncture (Table 2).

44 154

#### 45 155 *Measurements of anthropometric parameters*

46  
47  
48 156 Anthropometric data included height, body weight, bust, waist, hip and thigh  
49  
50 157 circumference, resting blood pressure, heart rate and hand grip. Height was measured  
51  
52 158 to the nearest 0.1 cm with participants' light-weight clothes and shoes off; weight was  
53  
54 159 measured to the nearest 0.01 kg with the weight scale (Ultrasonic surveying  
55  
56 160 instrument, Beryl BYH01, China) calibrated daily before each series of  
57  
58 161 measurements. Bust, waist, hip and thigh circumference were measured to the nearest  
59  
60 162 0.5 cm by using a measuring tape with the subject standing comfortably. Resting

1  
2  
3  
4 163 blood pressure and heart rate were measured on the left arm supported at heart-level  
5  
6 164 sitting position using electronic Sphygmomanometers (Yuwell YE660A, China). To  
7  
8 165 ensure accurate data of resting blood pressure and heart rate, the participants were  
9  
10 166 asked to take a rest for at least 5 minutes and have no excessive physical activity.  
11  
12 167 Using a handgrip dynamometer (CAMRY EH101, China), grip strength with both  
13  
14 168 hands were tested for most of the participants in WBBC pilot 2 and WBBC pilot 3. In  
15  
16 169 order to get more accurate results, the participants should make sure the arm that's  
17  
18 170 being tested was at a 90 degree angle at the elbow[29] until the test was finished.  
19  
20 171 Details of the methods and instruments used for measurements of anthropometric  
21  
22 172 parameters were provided in Table 3.

23  
24 173

#### 25 174 *Biochemistry assessment*

26  
27 175 Participants came to the examination center in each college in the morning with at  
28  
29 176 least 8 h of overnight fasting, about 25 ml of venous blood samples was collected for  
30  
31 177 routine blood measurements, biochemical indexes, DNA extraction and so on. To  
32  
33 178 ensure accurate data, the participants were asked not to have tea or alcohol intake or  
34  
35 179 smoking for at least one night before blood sample collection. Venous blood samples  
36  
37 180 were collected using ethylenediamine tetraacetic acid dipotassium (EDTAK2)  
38  
39 181 anticoagulation tube (3×5.0 ml) and vacuum tube without anticoagulation (2×5.0 ml).  
40  
41 182 Serum and plasma samples were separated from whole blood through centrifugation  
42  
43 183 for 10 min at the relative centrifugal force 3000 g (Figure 3). Serum samples were  
44  
45 184 forwarded to test biochemical indexes that included serum 25(OH)D level, serum  
46  
47 185 calcium level, fasting blood glucose, kidney function test, hepatic function test, blood  
48  
49 186 lipids [triglyceride, cholesterol, low-density lipoprotein (LDL), high-density  
50  
51 187 lipoprotein (HDL)], triiodothyronine (T3), thyroid and parathyroid function and bone  
52  
53 188 turnover markers (Table 2). Details of the platforms used for biochemical analysis are  
54  
55 189 provided in Table 3. We also reserved serum samples (2×0.5ml) for each participant  
56  
57 190 at - 80°C for future use. Figure 3 displays the detail of the flow diagram of blood  
58  
59 191 separation and detection of main blood biochemical indexes.

60 192

1  
2  
3  
4 193 *Questionnaire-based assessments*

5 194 Baseline data collection for participants included a self-completion questionnaire. In  
6  
7 195 Table 2, a list of core questions within the aforementioned domains, was provided.  
8  
9 196 The questionnaire included social and demographic measures data (e.g. age, sex,  
10  
11 197 ethnicity, family economic status and born place), menstrual history (for female),  
12  
13 198 lifestyle (e.g. physical activity, smoking, alcohol, tea and coffee intake), additional  
14  
15 199 supplement (e.g. calcium and vitamin D), health status and other information. In  
16  
17 200 WBBC pilot 1, the questionnaire only had “yes” and “no” choices for current smoking  
18  
19 201 and alcohol status, in WBBC pilot 2 and 3, we updated the questionnaire to include  
20  
21 202 the frequency information for smoking and alcohol. Sleep duration and sleep quality  
22  
23 203 were assessed by the Pittsburgh Sleep Quality Index (PSQI)[30]. This is composed of  
24  
25 204 19 questions which reflect seven major components, all seven components are then  
26  
27 205 summed up to create a scale from 0–21 points.  
28

29 206  
30  
31 207 *Bone mineral density assessment*

32  
33 208 Bone mineral density (BMD) is expressed in terms of bone mass per cm<sup>2</sup> (g/cm<sup>2</sup>) and  
34  
35 209 were assessed by dual-energy X-ray absorptiometry[31] (DXA, Discovery QDR  
36  
37 210 4500; Hologic Inc., Waltham, MA, USA). In WBBC pilot, the main sites for BMD  
38  
39 211 evaluation were lumbar spine (L1–L4), femur (femoral neck and total hip) and distal  
40  
41 212 third of the radius.  
42

43 213  
44  
45 214 *Whole Genome sequencing and genotyping*

46  
47 215 In the process of collecting fasting venous blood, 5-ml whole blood was used for  
48  
49 216 isolation of genomic DNA. These genomic DNA was used for whole genome  
50  
51 217 sequencing and genotyping (Figure 3). Whole genome sequencing was completed by  
52  
53 218 NovaSeq 6000 system (Illumina Co., Ltd), and for now, 1,192 participants have been  
54  
55 219 sequenced at a mean depth of 14x, with highest depth of 65x. A Chinese specific  
56  
57 220 reference panel will be constructed for imputation for the Chinese population. Whole  
58  
59 221 genome genotyping was completed with Infinium Asian Screening Array (ASA)  
60  
222 (Illumina Co., Ltd), and 5,841 participants have been genotyped in approximately



1  
2  
3  
4 223 700,000 SNPs.

5  
6 224

7 225 *Follow-up and outcome measures*

8  
9 226 We are seeking funding to follow the cohort to examine the development and growth  
10  
11 227 of the participants, and to investigate the effect of environmental factors on later  
12  
13 228 outcomes. An important area of future research will focus on the development of bone  
14  
15 229 mineral density and body weight from late adolescence to adulthood. Figure 2 shows  
16  
17 230 the overall study plan. Follow-up surveys will be conducted according to the design of  
18  
19 231 the subsequent research projects, the participants will be invited for survey with  
20  
21 232 repeat interviews, including the questionnaire, anthropometric measurements, grip  
22  
23 233 strength and bone mineral density collection as those used in the baseline stage and  
24  
25 234 the data of nutritional status by food frequency questionnaire.

26  
27 235

28  
29 236 We have started a pilot follow-up study for WBBC pilot 2 since December 2019, and  
30  
31 237 1,303 participants had completed all examinations (Figure 2). The collected  
32  
33 238 information included height, weight, grip strength and the updated questionnaire.  
34  
35 239 Besides, we retested bone mineral density at the spine (L1-L4), hip and distal third of  
36  
37 240 the radius.

38  
39 241

#### 40 242 **Statistical analysis**

41  
42 243 To test the differences in means and proportions between male and female, we used  
43  
44 244 T-test and Chi-square tests for continuous and categorical variables, respectively. All  
45  
46 245 variables were presented by unadjusted proportions for categorical variables and  
47  
48 246 unadjusted means with standard deviations (SD) for continuous variables. The  
49  
50 247 variables demonstrating a p-value of less than 0.05 were considered statistically  
51  
52 248 significant. All statistical analyses were analyzed using Stata 12.0 software.

53  
54 249

#### 55 56 250 **Findings to date**

57  
58  
59 251 This pilot cohort of WBBC is a large, longitudinal survey conducted among  
60



1  
2  
3  
4 252 adolescents and young adults in China. We surveyed 14,726 young people aged 14–  
5  
6 253 25 years who were college students and available for completing follow-up studies.  
7  
8 254 The baseline survey was carried out from 2017 to 2019, including WBBC pilot 1  
9  
10 255 (5,290 participants), WBBC pilot 2 (6,258 participants) and WBBC pilot 3 (3,178  
11  
12 256 participants).

13  
14 257  
15  
16 258 We have several ongoing projects under WBBC pilot study. One of the most  
17  
18 259 significant ongoing projects is the whole genome sequencing (WGS) study for  
19  
20 260 Chinese population, the results were reported elsewhere[32]. In brief, 4,535  
21  
22 261 whole-genome sequencing individuals and 5,481 high-density genotyping individuals  
23  
24 262 were available in WBBC pilot project, covering 30 provincial regions of China. Since  
25  
26 263 our previous study[33] demonstrated that the existing reference panels, such as the  
27  
28 264 1000 Genome Phase3 panel[34] and the HRC (Haplotype Reference Consortium)  
29  
30 265 panel[35], were not the best fit for imputation for the Chinese population, our WGS  
31  
32 266 data provided a population specific reference panel to improve the imputation  
33  
34 267 accuracy of Chinese GWAS study. We also provided an online imputation server  
35  
36 268 (<https://imputationserver.westlake.edu.cn/>) which could result in higher imputation  
37  
38 269 accuracy compared to the existing panels, especially for lower frequency variants[32].  
39  
40 270

41 271 Given the extensive range of data collected in the WBBC study  
42  
43 272 (<https://wbcc.westlake.edu.cn/index.html>), it is not feasible to present all the results,  
44  
45 273 only limited findings were described in the present study. In summary, a total of  
46  
47 274 17,407 college students were invited, of whom, 14,983 (86.07 %) responded. After  
48  
49 275 removing participants with missing data and invalid data, the final study included an  
50  
51 276 effective sample size of 14,726 (84.60%) adolescents and young adults (with age from  
52  
53 277 14 to 25 years, and mean age 18.5 years). Table 4 provides an overview of  
54  
55 278 social-demographic, anthropometry, cardiovascular system, lifestyle, grip strength  
56  
57 279 and BMD characteristics of the WBBC pilot participants at baseline. Briefly, within  
58  
59 280 the 14,726 samples, there were more females than males (67.7 vs. 32.3%), with a  
60  
281 mean age of 18.5 years for female and 18.6 years for males, respectively. Most of the

1  
2  
3  
4 282 participants were Chinese Han ethnic (97.8%), and more than 60% of them were  
5  
6 283 originally from rural areas (60.2% of males and 69.6% of females). For  
7  
8 284 anthropometry measurements, the mean height and weight were 172.9 cm and 65.81  
9  
10 285 kg for males, and 160.1 cm and 52.9 kg for females; the mean waist, hip and thigh  
11  
12 286 circumference were 75.5cm, 90.8cm and 51.6 cm in males, and 71.7cm, 89.8cm and  
13  
14 287 51.7 among females. The mean systolic blood pressure (SBP), diastolic blood  
15  
16 288 pressure (DBP) and heart rate (HR) in participants were 113 mmHg, 71 mmHg and 86  
17  
18 289 beats/minute, respectively. In the cohort, only 5.5% of the participants were current  
19  
20 290 smokers and 38.8% of them were regular drinkers. Regarding the current smoking  
21  
22 291 status, there was a significant difference between males and females (16.3 vs. 1.6%,  $p$   
23  
24 292  $< 0.001$ ). As for alcohol, the proportion of current drinker in males and females was  
25  
26 293 62.0% and 29.2%, respectively, which is much higher in males ( $p < 0.001$ ). The mean  
27  
28 294 sleeping time estimated in females was higher than males (8.3 vs. 8.0 hours,  $p <$   
29  
30 295 0.001). As for grip strength, the data collection was started from WBBC pilot 2, the  
31  
32 296 mean of grip strength in males were much higher than females (grip-left: 36.66 vs.  
33  
34 297 27.38kg and grip-right: 39.90 vs. 29.76 kg, both  $p < 0.001$ ).

35  
36  
37 299 Height and weight were measured using the standardized procedures. Body mass  
38  
39 300 index (BMI) was calculated based on the formula: weight in kilograms divided by  
40  
41 301 height in meters-squared ( $\text{kg}/\text{m}^2$ ). According to the Working Group on Obesity in  
42  
43 302 China (WGOC)[36], participants were defined as underweight ( $< 18.5 \text{ kg}/\text{m}^2$ ), normal  
44  
45 303 weight ( $18.5\text{-}23.9 \text{ kg}/\text{m}^2$ ), overweight ( $24\text{-}27.9 \text{ kg}/\text{m}^2$ ) and obese ( $\geq 28 \text{ kg}/\text{m}^2$ ).  
46  
47 304 Therefore, the WBBC pilot study provided an overall prevalence of underweight,  
48  
49 305 overweight and obesity among young participants of 24.3%, 11.5% and 5.0%,  
50  
51 306 respectively (Table 5). The prevalence of underweight in female was much higher  
52  
53 307 than male (26.4% vs. 19.7%,  $p < 0.0001$ ), but the prevalence of overweight in female  
54  
55 308 was much lower than male (9.0% vs. 16.7%,  $p < 0.0001$ ) (Table 5), similarly, the  
56  
57 309 prevalence of obesity in female (3.2%) was lower than in male (8.9%) ( $p < 0.0001$ )  
58  
59 310 (Table 5). Waist circumference (WC) is a good indicator of abdominal visceral fat  
60  
311 distribution and is a strong predictor of diabetes mellitus and cardiovascular

1  
2  
3  
4 312 disease[37]. It is meaningful to investigate the WC along with BMI among  
5  
6 313 adolescents and young people. In WBBC pilot study, central obesity was defined as  
7  
8 314  $WC \geq 85$  cm for males and as  $WC \geq 80$  cm for females based on the recommendations  
9  
10 315 of the WGOE [36]. In the cohort of 12,396 participants, the prevalence of central  
11  
12 316 obesity was 14.6%, which was higher in male than in female (19.1% vs. 12.6%,  $p <$   
13  
14 317 0.0001) (Table 5).

15  
16 318

17 319 In WBBC pilot study, the prevalence of underweight were high in both male (19.7 %)  
18  
19 320 and female (26.4%), though the prevalence of moderate and severe underweight  
20  
21 321 decreased from 9.2% in 1975 to 8.4% in 2016 in girls and from 14.8% in 1975 to  
22  
23 322 12.4% in 2016 in boys in the world[38]. These results might be due to the modern  
24  
25 323 aesthetics of human stature that thinness is preferred, especially in China[39 40].  
26  
27 324 Recently, a study involving 2,023 young female participants (70.5% subjects aged  
28  
29 325 20-25 years) from eight Chinese universities[40] showed that 30.55% of the  
30  
31 326 participants were underweight, and 57.39% of them would like to be much thinner,  
32  
33 327 which would lead to more underweight individuals. A silhouette-matching test was  
34  
35 328 administered in mainland China and found that the majority of the female participants  
36  
37 329 indicated a preference to be more slender[41]. Their ideal figure was underweight and  
38  
39 330 was far smaller than the most attractive female figure chosen by male  
40  
41 331 participants[41]. Therefore, future studies should not only pay attention to the  
42  
43 332 problem of obesity/overweight, but also to the underweight issue with young people.

44  
45 333

46 334 Using simple anthropometric indices of body composition, such as BMI and WC, has  
47  
48 335 been considered as a practical and valuable approach to the assessment of obesity for  
49  
50 336 a long time. Waist-to-hip ratios (WHR), waist-to-height ratios (WHtR), a body shape  
51  
52 337 index (ABSI)[42] and body roundness index (BRI)[43] were also as parameters of  
53  
54 338 body fat and visceral adipose tissue volume. In WBBC pilotcohort, we had collected  
55  
56 339 several anthropometric measures including height, weight, bust, waist, hip and thigh  
57  
58 340 circumference and these data could help us examine the usefulness of these  
59  
60 341 anthropometric parameters and identify the optimal cut-off of the parameters to

1  
2  
3  
4 342 evaluate overweight and obesity among adolescents and young people in future study.

5  
6 343

7  
8 344 In WBBC pilot study, the mean serum 25(OH)D level was  $22.4 \pm 5.3$  ng/ml for all the  
9  
10 345 participants (male: 25.2 ng/mL, and female: 21.1 ng/mL,  $p < 0.0001$ ) (Table 6).

11  
12 346 Overall, 33.5% of the participants had vitamin D deficiency and even more  
13  
14 347 participants suffered from vitamin D insufficiency (58.2%) (Table 6). In addition, the

15  
16 348 proportion of females with sufficient vitamin D was much lower than that of males  
17  
18 349 (3.7 vs. 17.9%,  $p < 0.0001$ ), while the proportion of deficiency in females was much

19  
20 350 higher than that in males (41.8 vs. 16.4%,  $p < 0.0001$ ) (Table 6). Most of the  
21  
22 351 participants (86.9%) preferred to stay indoors in spare time, the females were less

23  
24 352 willing to do exercise than males (53.7% vs 70.6%) (Table 7), and 44.6% of females  
25  
26 353 hardly had outdoor activities, only 5.9% of females often had outdoor activities every

27  
28 354 week (Table 7). These results, jointly suggested that the females had not enough sun  
29  
30 355 exposure. Although food sources of vitamin D were not commonly recognized, only

31  
32 356 10–20% of vitamin D in human bodies was obtained through food sources[44]. In  
33  
34 357 WBBC pilot study, there was only 2.2% of the participants used vitamin D

35  
36 358 supplements (3.1% in male and 1.9% in female,  $p = 0.00098$ ) (Table 6) and this was  
37  
38 359 consistent with Zhou et al[45], which found that only 5.6 % of the students used

39  
40 360 vitamin D supplements in a university of Nanjing, China. It is noteworthy that vitamin  
41  
42 361 D deficiency in females was significantly worse than in males. This may due to the

43  
44 362 modern aesthetics of Chinese culture that paler skin is preferred, especially in  
45  
46 363 females. A questionnaire related to vitamin D and sun exposure was conducted at a

47  
48 364 university in Nanjing, China and found that 75.0 % of the students lacked sun  
49  
50 365 exposure because they would like to avoid dark skin[45]. In addition, most of the

51  
52 366 students (82.7 %) used sun protection, and sunscreen use was more popular in  
53  
54 367 females[45]. However, it was reported that using the amount of sun cream

55  
56 368 recommended by World Health Organization exponentially suppressed vitamin D  
57  
58 369 synthesis in the skin[46].

59  
60 370

## 371 **Collaboration**

372 Participants have agreed to provide their pseudonymized data being made available to  
373 other approved researchers. The WBBC pilot study welcomes and offers global  
374 collaboration. The data is not freely available in the public domain, but specific  
375 proposals and ideas for future collaboration would be very welcome. Applicants for  
376 collaboration and more information are encouraged to contact Dr. Hou-Feng Zheng  
377 (Email address: zhenghoufeng@westlake.edu.cn), the person in charge of this project.

## 379 **Funding**

380 This study was supported by the National Natural Science Foundation of China  
381 (32061143019 and 81871831), and by the Westlake Biobank for Chinese (WBBC)  
382 funds from Westlake University.

## 384 **Acknowledgements**

385 We gratefully acknowledge all the participants of this project, and thank all the people  
386 who helped us in the sample recruitment, including volunteers, laboratory technicians,  
387 nurses and clerical workers. We also thank the High-Performance Computing Center  
388 at Westlake University for the facility support and technical assistance. In addition,  
389 we would like to thank Shanghai AvanTech BioSciences Co., Ltd for their support  
390 and assistance in sample storage and management.

## 392 **Contributors**

393 H.-F.Z. gained funds and conceived of the study, and K.-Q.L., P.-Y.W., J.-Y.C.,  
394 X.-J.X., J.-J.X., M.-C.Q., C.L. and S.-Y.X. were involved in the sample collection.  
395 J.-Q.L. and Y.S. were involved in the blood biochemistry testing. W.-Y.B., P.-P.Z.,  
396 J.X., S.-R.G., P.-L.G., Y.Q. and P.-K.C. were involved in the DNA extraction.  
397 X.-W.Z. and H.-F.Z. analyzed the data and wrote the paper. All authors read and  
398 approved the final manuscript.

1  
2  
3  
4 399  
5

6  
7 **400 Conflict of interest**

8  
9 401 Jun-Quan Liu and Yi Sun are employees of Hangzhou Kingmed Diagnostics Co., Ltd.

10  
11 402 The other authors have no conflict of interest to declare.

12  
13 403

14  
15 **404 Patient and public involvement**

16  
17 405 It was not appropriate or possible to involve patients or the public in the design, or

18  
19 406 conduct, or reporting, or dissemination plans of our research.

20  
21 407

22  
23 **408 Ethics Approval and Consent to Participate**

24  
25 409 The study protocol and informed consent procedure were approved by the Ethics

26  
27 410 Committees at Westlake University. All study participants signed the informed

28  
29 411 consent form before taking part in the study.  
30  
31  
32  
33  
34  
35  
36  
37  
38  
39  
40  
41  
42  
43  
44  
45  
46  
47  
48  
49  
50  
51  
52  
53  
54  
55  
56  
57  
58  
59  
60

## References

1. Steinbeck K, Hazell P, Cumming RG, et al. The study design and methodology for the ARCHER study--adolescent rural cohort study of hormones, health, education, environments and relationships. *BMC pediatrics* 2012;**12**:143 doi: 10.1186/1471-2431-12-143[published Online First: Epub Date]].
2. Patton GC, Coffey C, Carlin JB, et al. Overweight and obesity between adolescence and young adulthood: a 10-year prospective cohort study. *The Journal of adolescent health : official publication of the Society for Adolescent Medicine* 2011;**48**(3):275-80 doi: 10.1016/j.jadohealth.2010.06.019[published Online First: Epub Date]].
3. Sawyer SM, Afifi RA, Bearinger LH, et al. Adolescence: a foundation for future health. *Lancet* 2012;**379**(9826):1630-40 doi: 10.1016/S0140-6736(12)60072-5[published Online First: Epub Date]].
4. Yu Z, Han S, Chu J, et al. Trends in overweight and obesity among children and adolescents in China from 1981 to 2010: a meta-analysis. *PloS one* 2012;**7**(12):e51949 doi: 10.1371/journal.pone.0051949[published Online First: Epub Date]].
5. Ng M, Fleming T, Robinson M, et al. Global, regional, and national prevalence of overweight and obesity in children and adults during 1980-2013: a systematic analysis for the Global Burden of Disease Study 2013. *Lancet* 2014;**384**(9945):766-81 doi: 10.1016/S0140-6736(14)60460-8[published Online First: Epub Date]].
6. Jiang Y, Wang J, Wu S, et al. Association between Take-Out Food Consumption and Obesity among Chinese University Students: A Cross-Sectional Study. *International journal of environmental research and public health* 2019;**16**(6) doi: 10.3390/ijerph16061071[published Online First: Epub Date]].
7. Zhang J, Wang H, Wang Z, et al. Prevalence and stabilizing trends in overweight and obesity among children and adolescents in China, 2011-2015. *BMC public health* 2018;**18**(1):571 doi: 10.1186/s12889-018-5483-9[published Online First: Epub Date]].
8. Freedman DS, Kahn HS, Mei Z, et al. Relation of body mass index and waist-to-height ratio to cardiovascular disease risk factors in children and adolescents: the Bogalusa Heart Study. *The American journal of clinical nutrition* 2007;**86**(1):33-40 doi: 10.1093/ajcn/86.1.33[published Online First: Epub Date]].
9. Llewellyn A, Simmonds M, Owen CG, et al. Childhood obesity as a predictor of morbidity in adulthood: a systematic review and meta-analysis. *Obesity reviews : an official journal of the International Association for the Study of Obesity* 2016;**17**(1):56-67 doi: 10.1111/obr.12316[published Online First: Epub Date]].
10. Jeon K, Kim DI. The Association between Low Body Weight and Scoliosis among Korean Elementary School Students. *International journal of environmental research and public health* 2018;**15**(12) doi: 10.3390/ijerph15122613[published Online First: Epub Date]].
11. He Q, Karlberg J. Bmi in childhood and its association with height gain, timing of puberty, and final height. *Pediatric research* 2001;**49**(2):244-51 doi: 10.1203/00006450-200102000-00019[published Online First: Epub Date]].
12. Hudson LD, Nicholls DE, Lynn RM, et al. Medical instability and growth of children and adolescents with early onset eating disorders. *Archives of disease in childhood* 2012;**97**(9):779-84 doi: 10.1136/archdischild-2011-301055[published Online First: Epub Date]].



13. Antonucci R, Locci C, Clemente MG, et al. Vitamin D deficiency in childhood: old lessons and current challenges. *Journal of pediatric endocrinology & metabolism : JPEM* 2018;**31**(3):247-60 doi: 10.1515/jpem-2017-0391[published Online First: Epub Date]].
14. Trehan N, Afonso L, Levine DL, et al. Vitamin D Deficiency, Supplementation, and Cardiovascular Health. *Critical pathways in cardiology* 2017;**16**(3):109-18 doi: 10.1097/HPC.000000000000122[published Online First: Epub Date]].
15. Watkins RR, Lemonovich TL, Salata RA. An update on the association of vitamin D deficiency with common infectious diseases. *Canadian journal of physiology and pharmacology* 2015;**93**(5):363-8 doi: 10.1139/cjpp-2014-0352[published Online First: Epub Date]].
16. Illescas-Montes R, Melguizo-Rodriguez L, Ruiz C, et al. Vitamin D and autoimmune diseases. *Life sciences* 2019;**233**:116744 doi: 10.1016/j.lfs.2019.116744[published Online First: Epub Date]].
17. Holick MF. Vitamin D deficiency. *The New England journal of medicine* 2007;**357**(3):266-81 doi: 10.1056/NEJMra070553[published Online First: Epub Date]].
18. Holick MF, Binkley NC, Bischoff-Ferrari HA, et al. Evaluation, treatment, and prevention of vitamin D deficiency: an Endocrine Society clinical practice guideline. *The Journal of clinical endocrinology and metabolism* 2011;**96**(7):1911-30 doi: 10.1210/jc.2011-0385[published Online First: Epub Date]].
19. Pludowski P, Grant WB, Bhattoa HP, et al. Vitamin d status in central europe. *International journal of endocrinology* 2014;**2014**:589587 doi: 10.1155/2014/589587[published Online First: Epub Date]].
20. Newhook LA, Sloka S, Grant M, et al. Vitamin D insufficiency common in newborns, children and pregnant women living in Newfoundland and Labrador, Canada. *Maternal & child nutrition* 2009;**5**(2):186-91 doi: 10.1111/j.1740-8709.2008.00157.x[published Online First: Epub Date]].
21. Yoshimura N, Muraki S, Oka H, et al. Profiles of vitamin D insufficiency and deficiency in Japanese men and women: association with biological, environmental, and nutritional factors and coexisting disorders: the ROAD study. *Osteoporosis international : a journal established as result of cooperation between the European Foundation for Osteoporosis and the National Osteoporosis Foundation of the USA* 2013;**24**(11):2775-87 doi: 10.1007/s00198-013-2372-z[published Online First: Epub Date]].
22. Hirani V, Cumming RG, Blyth FM, et al. Vitamin D status among older community dwelling men living in a sunny country and associations with lifestyle factors: the Concord Health and Ageing in Men Project, Sydney, Australia. *The journal of nutrition, health & aging* 2013;**17**(7):587-93 doi: 10.1007/s12603-013-0013-z[published Online First: Epub Date]].
23. Faghih S, Abdolazadeh M, Mohammadi M, et al. Prevalence of vitamin d deficiency and its related factors among university students in shiraz, iran. *International journal of preventive medicine* 2014;**5**(6):796-9
24. Fraser DR. Vitamin D-deficiency in Asia. *The Journal of steroid biochemistry and molecular biology* 2004;**89-90**(1-5):491-5 doi: 10.1016/j.jsbmb.2004.03.057[published Online First: Epub Date]].
25. Yu X, Wang W, Wei Z, et al. Vitamin D status and related factors in newborns in Shanghai, China. *Nutrients* 2014;**6**(12):5600-10 doi: 10.3390/nu6125600[published Online First: Epub Date]].
26. Wang EW, Pang MY, Siu PM, et al. Vitamin D status and cardiometabolic risk factors in young



- adults in Hong Kong: associations and implications. *Asia Pacific journal of clinical nutrition* 2018;**27**(1):231-37 doi: 10.6133/apjcn.022017.08[published Online First: Epub Date]].
27. Guo Y, Ke HJ, Liu Y, et al. Prevalence of vitamin D insufficiency among children in southern china: A cross-sectional survey. *Medicine* 2018;**97**(25):e11030 doi: 10.1097/MD.00000000000011030[published Online First: Epub Date]].
28. Yan X, Zhang N, Cheng S, et al. Gender Differences in Vitamin D Status in China. *Medical science monitor : international medical journal of experimental and clinical research* 2019;**25**:7094-99 doi: 10.12659/MSM.916326[published Online First: Epub Date]].
29. Roberts HC, Denison HJ, Martin HJ, et al. A review of the measurement of grip strength in clinical and epidemiological studies: towards a standardised approach. *Age and ageing* 2011;**40**(4):423-9 doi: 10.1093/ageing/afr051[published Online First: Epub Date]].
30. Buysse DJ, Reynolds CF, 3rd, Monk TH, et al. The Pittsburgh Sleep Quality Index: a new instrument for psychiatric practice and research. *Psychiatry research* 1989;**28**(2):193-213 doi: 10.1016/0165-1781(89)90047-4[published Online First: Epub Date]].
31. Bazzocchi A, Ponti F, Albisinni U, et al. DXA: Technical aspects and application. *European journal of radiology* 2016;**85**(8):1481-92 doi: 10.1016/j.ejrad.2016.04.004[published Online First: Epub Date]].
32. Cong P, Bai W-Y, Li J, et al. Genomic analyses of 10,376 individuals provides comprehensive map of genetic variations, structure and reference haplotypes for Chinese population. *bioRxiv* 2021:2021.02.06.430086 doi: 10.1101/2021.02.06.430086[published Online First: Epub Date]].
33. Bai WY, Zhu XW, Cong PK, et al. Genotype imputation and reference panel: a systematic evaluation on haplotype size and diversity. *Briefings in bioinformatics* 2019 doi: 10.1093/bib/bbz108[published Online First: Epub Date]].
34. Genomes Project C, Auton A, Brooks LD, et al. A global reference for human genetic variation. *Nature* 2015;**526**(7571):68-74 doi: 10.1038/nature15393[published Online First: Epub Date]].
35. McCarthy S, Das S, Kretzschmar W, et al. A reference panel of 64,976 haplotypes for genotype imputation. *Nature genetics* 2016;**48**(10):1279-83 doi: 10.1038/ng.3643[published Online First: Epub Date]].
36. Zhou BF, Cooperative Meta-Analysis Group of the Working Group on Obesity in C. Predictive values of body mass index and waist circumference for risk factors of certain related diseases in Chinese adults--study on optimal cut-off points of body mass index and waist circumference in Chinese adults. *Biomedical and environmental sciences : BES* 2002;**15**(1):83-96
37. Asia Pacific Cohort Studies C. Central obesity and risk of cardiovascular disease in the Asia Pacific Region. *Asia Pacific journal of clinical nutrition* 2006;**15**(3):287-92
38. Collaboration NCDRF. Worldwide trends in body-mass index, underweight, overweight, and obesity from 1975 to 2016: a pooled analysis of 2416 population-based measurement studies in 128.9 million children, adolescents, and adults. *Lancet* 2017;**390**(10113):2627-42 doi: 10.1016/S0140-6736(17)32129-3[published Online First: Epub Date]].
39. Chen H, Jackson T. Predictors of changes in weight esteem among mainland Chinese adolescents: a longitudinal analysis. *Developmental psychology* 2009;**45**(6):1618-29 doi: 10.1037/a0016820[published Online First: Epub Date]].

- 1  
2  
3  
4  
5  
6  
7  
8  
9  
10  
11  
12  
13  
14  
15  
16  
17  
18  
19  
20  
21  
22  
23  
24  
25  
26  
27  
28  
29  
30  
31  
32  
33  
34  
35  
36  
37  
38  
39  
40  
41  
42  
43  
44  
45  
46  
47  
48  
49  
50  
51  
52  
53  
54  
55  
56  
57  
58  
59  
60
40. Zhang L, Qian H, Fu H. To be thin but not healthy - The body-image dilemma may affect health among female university students in China. *PloS one* 2018;**13**(10):e0205282 doi: 10.1371/journal.pone.0205282[published Online First: Epub Date]].
41. Wang K, Liang R, Ma ZL, et al. Body image attitude among Chinese college students. *PsyCh journal* 2018;**7**(1):31-40 doi: 10.1002/pchj.200[published Online First: Epub Date]].
42. Krakauer NY, Krakauer JC. A new body shape index predicts mortality hazard independently of body mass index. *PloS one* 2012;**7**(7):e39504 doi: 10.1371/journal.pone.0039504[published Online First: Epub Date]].
43. Thomas DM, Bredlau C, Bosity-Westphal A, et al. Relationships between body roundness with body fat and visceral adipose tissue emerging from a new geometrical model. *Obesity* 2013;**21**(11):2264-71 doi: 10.1002/oby.20408[published Online First: Epub Date]].
44. Mithal A, Wahl DA, Bonjour JP, et al. Global vitamin D status and determinants of hypovitaminosis D. *Osteoporosis international : a journal established as result of cooperation between the European Foundation for Osteoporosis and the National Osteoporosis Foundation of the USA* 2009;**20**(11):1807-20 doi: 10.1007/s00198-009-0954-6[published Online First: Epub Date]].
45. Zhou M, Zhuang W, Yuan Y, et al. Investigation on vitamin D knowledge, attitude and practice of university students in Nanjing, China. *Public health nutrition* 2016;**19**(1):78-82 doi: 10.1017/S1368980015000373[published Online First: Epub Date]].
46. Fauschou A, Beyer DM, Schmedes A, et al. The relation between sunscreen layer thickness and vitamin D production after ultraviolet B exposure: a randomized clinical trial. *The British journal of dermatology* 2012;**167**(2):391-5 doi: 10.1111/j.1365-2133.2012.11004.x[published Online First: Epub Date]].

## Tables

Table 1. The participants of the cohort at baseline.

| Year  | Phase        | Area               | Total  | Sex   |        |
|-------|--------------|--------------------|--------|-------|--------|
|       |              |                    |        | Male  | Female |
| 2017  | WBBC pilot 1 | Zhejiang province  | 1,258  | 460   | 798    |
|       |              | Jiangxi province   | 2,769  | 862   | 1,907  |
|       |              | Other 25 provinces | 1,263  | 336   | 927    |
| 2018  | WBBC pilot 2 | Shandong province  | 2,920  | 1,115 | 1,805  |
|       |              | Jiangxi province   | 2,032  | 578   | 1,454  |
|       |              | Other 28 provinces | 1,306  | 438   | 868    |
| 2019  | WBBC pilot 3 | Jiangxi province   | 2,504  | 761   | 1,743  |
|       |              | Other 26 provinces | 674    | 201   | 473    |
| Total |              |                    | 14,726 | 4,751 | 9,975  |

Table 2. Summary of data collected in the Cohort.

| Measures                             | Instruments                                                                                                                |
|--------------------------------------|----------------------------------------------------------------------------------------------------------------------------|
| Anthropometry*                       | Height and weight, bust, waist, hip and thigh circumference                                                                |
| Strength                             | Grip strength (right and left hand)                                                                                        |
| Cardiovascular system                | Blood pressure (SBP & DBP), heart rate                                                                                     |
| Bone mineral density                 | Lumar spine, hip and forearm                                                                                               |
| Questionnaires                       |                                                                                                                            |
| Demographic data                     | Age, sex, ethnicity, family economic status, birthplace                                                                    |
| Menstrual history (for female)       | Age of menarche, Gynaecological disease history                                                                            |
| Sleeping situation                   | Pittsburgh sleep quality index, PSQI                                                                                       |
| Lifestyle                            | Smoking status, alcohol, tea and coffee consumption, exercise                                                              |
| Supplementations                     | Calcium, vitamin D                                                                                                         |
| Health status                        | Medical history and medications                                                                                            |
| Physical activity <sup>#</sup>       | International Physical Activity Questionnaire, IPAQ                                                                        |
| Dietary pattern <sup>#</sup>         | Semi-Quantitative Food Frequency Questionnaire (SQFFQ)                                                                     |
| Routine biochemistry and Haematology |                                                                                                                            |
| Lipid metabolism                     | Total cholesterol, triglycerides, HDL-cholesterol, LDL-cholesterol                                                         |
| Kidney-related measures              | uric acid, creatinine and urea                                                                                             |
| Hepatic-related measures             | Alanine aminotransferase, glutamic oxaloacetylase, total bilirubin, direct bilirubin, albumin, globulin                    |
| Thyroid and parathyroid function     | TSH, PTH, T3, T4, FT3, FT4,                                                                                                |
| Routine diabetes test                | Fasting plasma glucose, glycosylated hemoglobin (HbA1c)                                                                    |
| Bone-related measures                | Bone turnover markers (Osteocalcin, PINP, NBAP and $\beta$ -CTX), serum 1,25(OH) <sub>2</sub> D <sub>3</sub> , serum IGF-1 |
| Mineral elements                     | Calcium (Ca), phosphorus (P) and magnesium (Mg)                                                                            |
| Samples                              |                                                                                                                            |
| Blood                                | 25 ml                                                                                                                      |
| Serum                                | 2 ml                                                                                                                       |
| Urine <sup>#</sup>                   | 10 ml                                                                                                                      |
| Faeces <sup>#</sup>                  | 15 g                                                                                                                       |

\* Direct measures carried out by trained interviewers according to standardized protocols; # measured only on WBBC pilot 3; BAP: Bone alkaline phosphatase; DBP: Diastolic blood pressure; FT3: free Triiodothyronine; FT4: free Tetraiodothyronine; HDL: High-density lipoprotein; IGF-1: Insulin-like growth factor 1; LDL: Low-density lipoprotein; PINP: N-terminal propeptide of procollagen type I; PTH: Parathyroid hormone; SBP: Systolic blood pressure; T3: Triiodothyronine; T4: Tetraiodothyronine; TSH: Thyroid stimulating hormone;  $\beta$ -CTx:  $\beta$ -isomerized C-terminal telopeptides

Table 3. List of anthropometric collected and platforms for biochemical tests at baseline in the cohort.

| Variables                                  | Analysis method/platform used                           |
|--------------------------------------------|---------------------------------------------------------|
| Height and weight                          | Ultrasonic surveying instrument, Beryl BYH01, China     |
| Waist, hip and thigh circumference         | Manufactured instrument (tape)                          |
| Resting blood pressure                     | Electronic sphygmomanometer, Yuwell YE660A, China       |
| Heart rate                                 | Electronic sphygmomanometer, Yuwell YE660A, China       |
| Grip strength                              | Digital hand dynamometer, CAMRY EH101, China            |
| Bone mineral density (BMD)                 | DXA, Discovery QDR 4500, Hologic Inc., Waltham, MA, USA |
| Blood routine (5 items)                    | SYSMEX 2100, Japan                                      |
| Serum IGF-1                                | CLIA, DPC immulite 2000, Siemens, Germany               |
| Serum calcium, phosphorus                  | ARCHITECT C16000, Abbott, USA                           |
| Fasting blood glucose                      | Cobas c501, Roche, Switzerland                          |
| Bone turnover markers                      | ECLIA, Cobas e602, Roche, Switzerland                   |
| Serum 1,25(OH) <sub>2</sub> D <sub>3</sub> | LC-MS/MS, AB Sciex API 4000™, USA                       |
| Thyroid and parathyroid function           | Chemical luminescence, ARCHITECT System i2000, USA      |
| Lipid metabolism                           | ARCHITECT C16000, Abbott, USA                           |
| Kidney-related measures                    | ARCHITECT C16000, Abbott, USA                           |
| Hepatic-related measures                   | ARCHITECT C16000, Abbott, USA                           |

CLIA: chemiluminescent immunoassay; ECLIA: electrochemoluminescence immunoassay;

LC-MS/MS: Liquid chromatography-tandem mass spectrometry.

Table 4. Basic characteristics of participants in baseline of WBBC pilot.

| Variables(unit)              |                     | Total         | Sex           |              | *P value |
|------------------------------|---------------------|---------------|---------------|--------------|----------|
|                              |                     |               | Male          | Female       |          |
| <b>Socio-demographic</b>     |                     |               |               |              |          |
| Age (years)                  | N <sup>a</sup>      | 14,726        | 4,751         | 9,975        | 0.001    |
|                              | M (SD) <sup>b</sup> | 18.5 (1.3)    | 18.6 (1.2)    | 18.5 (1.3)   |          |
| Gender                       | N (%) <sup>c</sup>  | 14,726 (100)  | 4,751 (32.3)  | 9,975 (67.7) | <0.001   |
| Ethnicity                    |                     |               |               |              | 0.305    |
| <i>Han</i>                   | N (%)               | 11,136 (97.8) | 3,642 (98.0)  | 7,494 (97.7) |          |
| <i>Others</i>                | N (%)               | 253 (2.2)     | 75 (2.0)      | 178 (2.3)    |          |
| Hukou status                 |                     |               |               |              | <0.001   |
| <i>Rural</i>                 | N (%)               | 5,951 (66.6)  | 1,739 (60.2)  | 4,212 (69.6) |          |
| <i>Urban</i>                 | N (%)               | 2,986(33.4)   | 1,148 (39.8)  | 1,838 (30.4) |          |
| <b>Anthropometry</b>         |                     |               |               |              |          |
| Height (cm)                  | N                   | 14,277        | 4,588         | 9,689        | <0.001   |
|                              | M (SD)              | 164.2 (8.5)   | 172.9 (6.6)   | 160.1 (5.8)  |          |
| Weight (kg)                  | N                   | 14,279        | 4,587         | 9,692        | <0.001   |
|                              | M (SD)              | 57.01 (12.32) | 65.81 (13.60) | 52.85 (9.07) |          |
| Waist (cm)                   | N                   | 12,396        | 3,905         | 8,491        | <0.001   |
|                              | M (SD)              | 71.7 (9.8)    | 75.5 (11.1)   | 69.9 (8.7)   |          |
| Hip (cm)                     | N                   | 12,388        | 3,902         | 8,486        | <0.001   |
|                              | M (SD)              | 89.8 (7.3)    | 90.8 (8.3)    | 89.3 (6.7)   |          |
| Thigh (cm)                   | N                   | 12,351        | 3,880         | 8,471        | 0.102    |
|                              | M (SD)              | 51.7 (5.7)    | 51.6 (6.5)    | 51.7 (5.3)   |          |
| <b>Cardiovascular system</b> |                     |               |               |              |          |
| SBP (mmHg)                   | N                   | 14,277        | 4,595         | 9,682        | <0.001   |
|                              | M (SD)              | 113 (12)      | 121 (12)      | 110 (11)     |          |
| DBP (mmHg)                   | N                   | 14,276        | 4,595         | 9,681        | <0.001   |
|                              | M (SD)              | 71 (9)        | 73 (9)        | 70 (8)       |          |
| Heart rate (beats/minute)    | N                   | 14,295        | 4,599         | 9,696        | <0.001   |
|                              | M (SD)              | 86 (13)       | 83 (13)       | 87 (13)      |          |
| <b>Lifestyle</b>             |                     |               |               |              |          |
| Smoking                      | N (%)               | 435 (5.9)     | 350 (16.3)    | 85 (1.6)     | <0.001   |
| Alcohol status               | N (%)               | 2,844 (38.8)  | 1,333 (62.0)  | 1,511 (29.2) | <0.001   |
| Sleeping time (hours)        | N                   | 7,247         | 2,115         | 5,132        |          |
|                              | M (SD)              | 8.2 (1.4)     | 8.0 (1.3)     | 8.3 (1.4)    | <0.001   |
| <b>Grip strength (kg)</b>    |                     |               |               |              |          |

|                               |        |               |               |               |        |
|-------------------------------|--------|---------------|---------------|---------------|--------|
|                               | N      | 8,932         | 2,958         | 5,974         | <0.001 |
| Left hand                     | M (SD) | 27.38 (8.77)  | 36.66 (7.53)  | 22.79 (4.82)  |        |
|                               | N      | 8,941         | 2,967         | 5,974         | <0.001 |
| Right hand                    | M (SD) | 29.76 (9.66)  | 39.90 (8.32)  | 24.72 (5.35)  |        |
| <b>BMD (g/cm<sup>2</sup>)</b> |        |               |               |               |        |
|                               | N      | 10,154        | 3,293         | 6,861         | <0.001 |
| Lumar spine                   | M (SD) | 0.910 (0.105) | 0.926 (0.112) | 0.903(0.100)  |        |
|                               | N      | 10,160        | 3,296         | 6,864         | <0.001 |
| Total hip                     | M (SD) | 0.868 (0.127) | 0.932 (0.139) | 0.837 (0.108) |        |
|                               | N      | 10,160        | 3,296         | 6,864         | <0.001 |
| Femoral neck                  | M (SD) | 0.778 (0.125) | 0.846 (0.138) | 0.746 (0.104) |        |
|                               | N      | 9,917         | 3,238         | 6,679         | <0.001 |
| Forearm                       | M (SD) | 0.657 (0.059) | 0.705 (0.057) | 0.634 (0.453) |        |

<sup>a</sup> N: sample size; <sup>b</sup>M (SD): mean (standard deviation); <sup>c</sup>N (%): sample size (percentage); \* T-test and Chi-square tests for continuous and categorical variables respectively to refer the significant differences between males and females; DBP: Diastolic blood pressure; SBP: Systolic blood pressure.

Table 5. Distribution of BMI or waist by sex in participants in WBBC pilot, 2017-2019. N=14,264.

| Variables                            | Total         | Male          | Female        | #P      |
|--------------------------------------|---------------|---------------|---------------|---------|
| Underweight, N (%)                   | 3,460 (24.3%) | 903 (19.7%)   | 2,557 (26.4%) | <0.0001 |
| Normal, N (%)                        | 8,446 (59.2%) | 2,507 (54.7%) | 5,939 (61.4%) | <0.0001 |
| Overweight, N (%)                    | 1,640 (11.5%) | 766 (16.7%)   | 874 (9.0%)    | <0.0001 |
| Obesity, N (%)                       | 718 (5.0%)    | 407 (8.9%)    | 311 (3.2%)    | <0.0001 |
| Central Obesity <sup>δ</sup> , N (%) | 1,812 (14.6%) | 746 (19.1%)   | 1,066 (12.6%) | <0.0001 |

<sup>δ</sup> Total sample size for Central Obesity was 12,396. # Chi-square tests was calculated between male and female. Participants were defined as underweight (< 18.5 kg/m<sup>2</sup>), normal weight (18.5-23.9 kg/m<sup>2</sup>), overweight (24-27.9 kg/m<sup>2</sup>) and obese ( $\geq$  28 kg/m<sup>2</sup>). Central obesity was defined as WC  $\geq$  85 cm for males and as WC  $\geq$  80 cm for females.



Table 6. Distribution of Vitamin D level by sex in subjects in WBBC pilot, 2017-2018. N=11,370.

| Variables                                      | Total         | Male          | Female        | P                    |
|------------------------------------------------|---------------|---------------|---------------|----------------------|
| Serum 1,25(OH)D, mean (SD)                     | 22.4 (5.3)    | 25.2 (5.4)    | 21.1 (4.7)    | <0.0001 <sup>¶</sup> |
| Vitamin D deficient, N (%)                     | 3,806 (33.5%) | 610 (16.4%)   | 3,196 (41.8%) | <0.0001 <sup>#</sup> |
| Vitamin D insufficient, N (%)                  | 6,614 (58.2%) | 2,452 (65.7%) | 4,162 (54.5%) | <0.0001 <sup>#</sup> |
| Vitamin D sufficient, N (%)                    | 950 (8.4%)    | 668 (17.9%)   | 282 (3.7%)    | <0.0001 <sup>#</sup> |
| Vitamin D supplementation <sup>δ</sup> , N (%) | 164 (2.2%)    | 67 (3.1%)     | 97 (1.9%)     | 0.00098 <sup>#</sup> |

<sup>δ</sup> The sample size for Vitamin D supplementation was 7,326. <sup>#</sup> Chi-square tests was calculated between male and female. <sup>¶</sup> T-test was calculated between male and female.

For peer review only

Table 7. Participants' general react about activity status in WBBC pilot, 2017-2018. N=7,326.<sup>a</sup>

|                                                      | Total         | Male          | Female        |
|------------------------------------------------------|---------------|---------------|---------------|
| What would you like to do in spare time?             |               |               |               |
| <i>Stay indoors</i>                                  | 6,364 (86.9%) | 1,754 (81.6%) | 4,610 (89.1%) |
| <i>Take part in some activities</i>                  | 962 (13.1%)   | 395 (18.4%)   | 567 (11.0. %) |
| Do you do exercise initiatively?                     |               |               |               |
| <i>Yes</i>                                           | 4,296 (58.6%) | 1,517 (70.6%) | 2,779 (53.7%) |
| <i>No</i>                                            | 3,030 (41.4%) | 632 (29.4%)   | 2,398 (46.3%) |
| How often do you have outdoor activities every week? |               |               |               |
| <i>Hardly</i>                                        | 2,785 (38.0%) | 477 (22.2%)   | 2,308 (44.6%) |
| <i>Occasionally</i>                                  | 3,865 (52.8%) | 1,301 (60.5%) | 2,564 (49.5%) |
| <i>Often</i>                                         | 676 (9.2%)    | 371 (17.3%)   | 305 (5.9%)    |

<sup>a</sup> Data are showed as n (%) of participants.

## Figure legend

Figure 1. Maps showing the sources of the samples in the Westlake BioBank for Chinese (WBBC) pilot cohort. A) provides a range of sample size in each province with different color, and B) provides the exact number of sample size in each province. AH: Anhui province; BJ: Beijing; CQ: Chongqing; FJ: Fujian province; GD: Guangdong province; GS: Gansu province; GX: Guangxi Autonomous Region; GZ: Guizhou province; HA: Henan province; HB: Hubei province; HE: Hebei province; HI: Hainan province; HL: Heilongjiang province; HN: Hunan province; JL: Jilin province; JS: Jiangsu province; JX: Jiangxi province; LN: Liaoning province; NM: Neimeng Autonomous Region; NX: Ningxia Autonomous Region; QH: Qinghai province; SC: Sichuan province; SD: Shandong province; SH: Shanghai; SN: Shanxi province; SX: Shanxi province; TJ: Tianjin; XJ: Xinjiang Autonomous Region; XZ: Xizang Autonomous Region; YN: Yunnan province; ZJ: Zhejiang province.

Figure 2. Data collection timeline. IPAQ: International Physical Activity Questionnaire; PA: Physical Activity; PSQI: Pittsburgh sleep quality index; SQFFQ: Semi-Quantitative Food Frequency Questionnaire.

Figure 3. Flow diagram of main blood biochemical detection and blood conservation. RCF: relative centrifugal force; WGS: whole genome sequence.

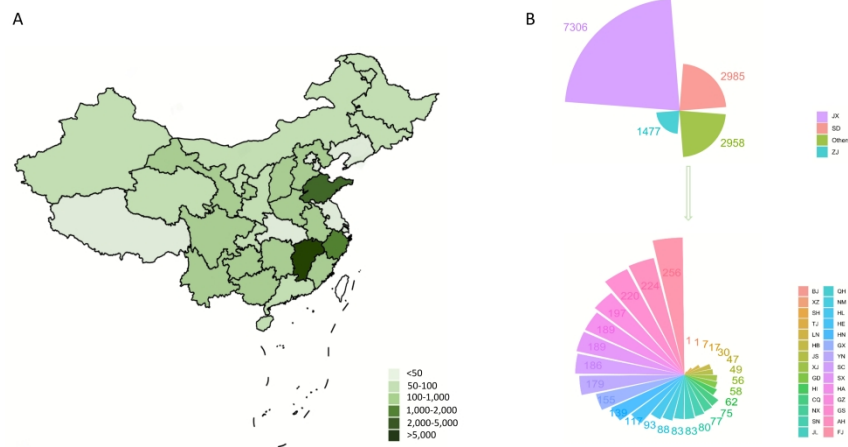

Figure 1. Maps showing the sources of the samples in the Westlake BioBank for Chinese (WBBC) pilot cohort. A) provides a range of sample size in each province with different color, and B) provides the exact number of sample size in each province. AH: Anhui province; BJ: Beijing; CQ: Chongqing; FJ: Fujian province; GD: Guangdong province; GS: Gansu province; GX: Guangxi Autonomous Region; GZ: Guizhou province; HA: Henan province; HB: Hubei province; HE: Hebei province; HI: Hainan province; HL: Heilongjiang province; HN: Hunan province; JL: Jilin province; JS: Jiangsu province; JX: Jiangxi province; LN: Liaoning province; NM: Neimeng Autonomous Region; NX: Ningxia Autonomous Region; QH: Qinghai province; SC: Sichuan province; SD: Shandong province; SH: Shanghai; SN: Shanxi province; SX: Shanxi province; TJ: Tianjin; XJ: Xinjiang Autonomous Region; XZ: Xizang Autonomous Region; YN: Yunnan province; ZJ: Zhejiang province.

338x190mm (400 x 400 DPI)

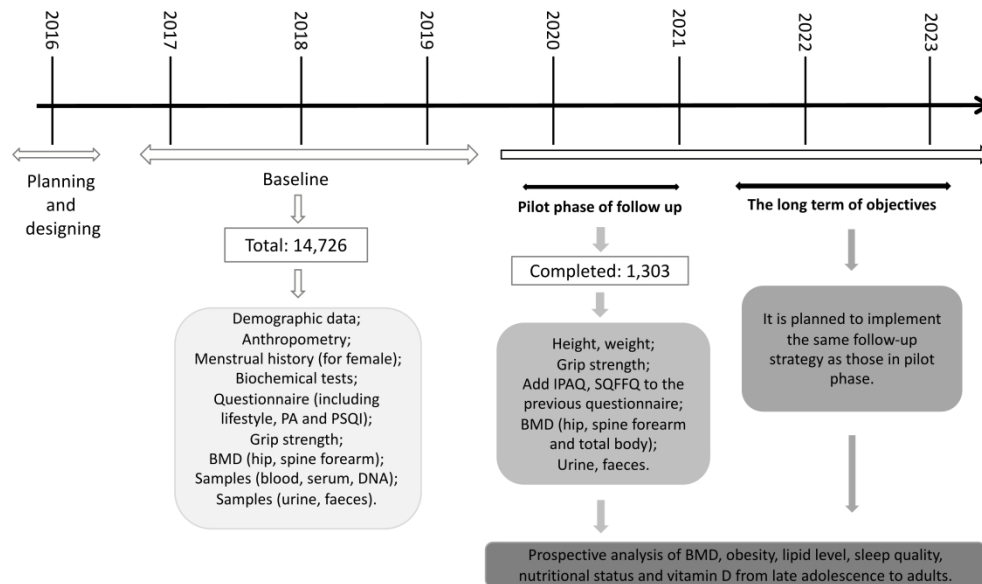

Figure 2. Data collection timeline. IPAQ: International Physical Activity Questionnaire; PA: Physical Activity; PSQI: Pittsburgh sleep quality index; SQFFQ: Semi-Quantitative Food Frequency Questionnaire.

254x190mm (400 x 400 DPI)

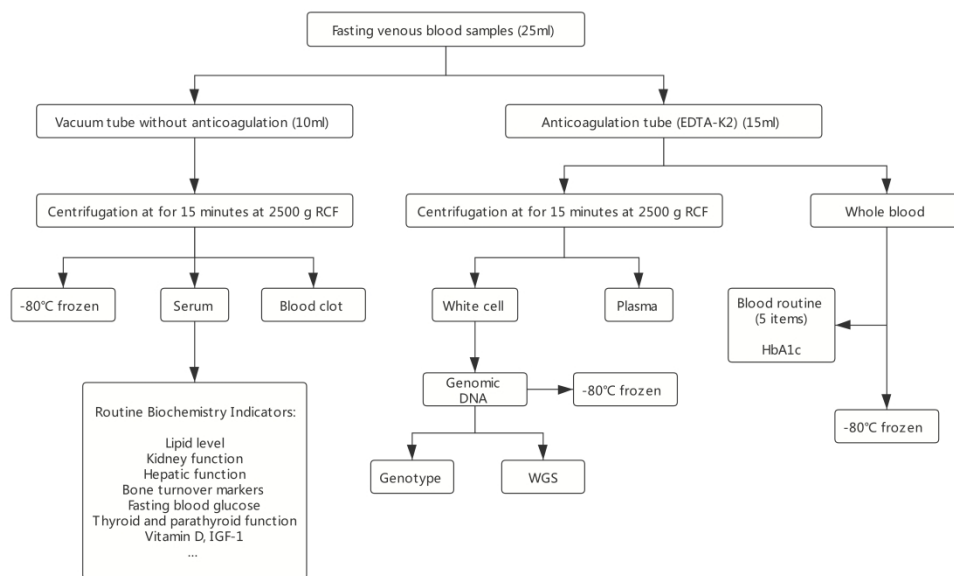

Figure 3. Flow diagram of main blood biochemical detection and blood conservation.  
RCF: relative centrifugal force; WGS: whole genome sequence.

363x223mm (400 x 400 DPI)
